# Supplementary material for: Low Complexity Regions in Proteins and DNA are Poorly Correlated
Source: PubMed Central journal article supplement — Mol Biol Evol. 2023 Apr 10;40(4):msad084. doi: 10.1093/molbev/msad084 (PMC10124876; doi:10.1093/molbev/msad084), 2023-04-10
Supplement: msad084_supplementary_data.pdf [file msad084_supplementary_data.pdf]

## Supplementary Material

Table S1: NCBI genome access date (mm/dd/yyyy) and assembly version numbers.

|                  | <i>S. cerevisiae</i> | <i>H. sapiens</i> | <i>A. thaliana</i> | <i>C. elegans</i> | <i>D. melanogaster</i> |
|------------------|----------------------|-------------------|--------------------|-------------------|------------------------|
| Access Date      | 04/30/2022           | 05/30/2022        | 06/09/2022         | 06/09/2022        | 06/10/2022             |
| Assembly Version | GCF_000146045.2      | GCF_000001405.40  | GCF_000001735.4    | GCF_000002985.6   | GCF_000001215.4        |

Table S2: Alternate  $\text{Seg}$  parameters used to identify LCRs from protein sequences in the five model organisms. Correlation coefficients and number of LCR data points are given for each parameter set.

| parameters |     |       | <i>S. cerevisiae</i> |       |        |       | <i>H. sapiens</i> |       |        |       | <i>A. thaliana</i> |       |        |       | <i>C. elegans</i> |       |        |       | <i>D. melanogaster</i> |       |        |       |
|------------|-----|-------|----------------------|-------|--------|-------|-------------------|-------|--------|-------|--------------------|-------|--------|-------|-------------------|-------|--------|-------|------------------------|-------|--------|-------|
| W          | K1  | K2    | r                    | n     | 95% CI |       | r                 | n     | 95% CI |       | r                  | n     | 95% CI |       | r                 | n     | 95% CI |       | r                      | n     | 95% CI |       |
| 12         | 1.7 | 1.7   | 0.420                | 1182  | 0.367  | 0.471 | 0.341             | 5812  | 0.315  | 0.366 | 0.454              | 5601  | 0.431  | 0.477 | 0.291             | 3588  | 0.257  | 0.324 | 0.350                  | 4222  | 0.320  | 0.379 |
|            |     | 2     | 0.474                | 1182  | 0.423  | 0.522 | 0.361             | 5812  | 0.336  | 0.386 | 0.475              | 5601  | 0.452  | 0.497 | 0.325             | 3588  | 0.292  | 0.357 | 0.382                  | 4222  | 0.353  | 0.410 |
|            |     | 2.7   | 0.591                | 1182  | 0.548  | 0.630 | 0.478             | 5812  | 0.456  | 0.500 | 0.596              | 5601  | 0.577  | 0.615 | 0.477             | 3588  | 0.448  | 0.505 | 0.535                  | 4222  | 0.511  | 0.559 |
|            | 1.9 | 1.9   | 0.404                | 2078  | 0.363  | 0.443 | 0.347             | 9944  | 0.328  | 0.366 | 0.452              | 10314 | 0.435  | 0.469 | 0.288             | 6456  | 0.263  | 0.313 | 0.358                  | 6200  | 0.334  | 0.382 |
|            |     | 2.2   | 0.443                | 2078  | 0.403  | 0.480 | 0.340             | 9944  | 0.320  | 0.359 | 0.468              | 10314 | 0.451  | 0.485 | 0.341             | 6456  | 0.317  | 0.365 | 0.394                  | 6200  | 0.370  | 0.417 |
|            |     | 2.9   | 0.545                | 2078  | 0.510  | 0.578 | 0.481             | 9944  | 0.464  | 0.498 | 0.595              | 10314 | 0.581  | 0.609 | 0.496             | 6456  | 0.475  | 0.516 | 0.560                  | 6200  | 0.541  | 0.579 |
|            | 2.1 | 2.1   | 0.416                | 3359  | 0.384  | 0.446 | 0.296             | 14282 | 0.279  | 0.313 | 0.427              | 16318 | 0.413  | 0.441 | 0.296             | 10530 | 0.276  | 0.315 | 0.369                  | 8669  | 0.349  | 0.389 |
|            |     | 2.4   | 0.443                | 3359  | 0.412  | 0.473 | 0.308             | 14282 | 0.291  | 0.324 | 0.457              | 16318 | 0.443  | 0.470 | 0.326             | 10530 | 0.307  | 0.345 | 0.406                  | 8669  | 0.386  | 0.425 |
|            |     | 3.1   | 0.550                | 3359  | 0.523  | 0.575 | 0.556             | 14282 | 0.543  | 0.569 | 0.650              | 16318 | 0.640  | 0.660 | 0.580             | 10530 | 0.566  | 0.594 | 0.631                  | 8669  | 0.617  | 0.645 |
| 1.7        | 1.7 | 0.425 | 654                  | 0.352 | 0.492  | 0.347 | 3167              | 0.312 | 0.381  | 0.483 | 2712               | 0.450 | 0.515  | 0.276 | 1976              | 0.230 | 0.321  | 0.336 | 2880                   | 0.299 | 0.372  |       |
|            | 2   | 0.466 | 654                  | 0.396 | 0.530  | 0.361 | 3167              | 0.327 | 0.394  | 0.510 | 2712               | 0.478 | 0.540  | 0.303 | 1976              | 0.258 | 0.347  | 0.394 | 2880                   | 0.359 | 0.428  |       |
|            | 2.7 | 0.581 | 654                  | 0.521 | 0.634  | 0.480 | 3167              | 0.450 | 0.509  | 0.613 | 2712               | 0.586 | 0.639  | 0.447 | 1976              | 0.407 | 0.485  | 0.537 | 2880                   | 0.507 | 0.565  |       |
| 15         | 1.9 | 1.9   | 0.458                | 1034  | 0.402  | 0.510 | 0.357             | 5005  | 0.330  | 0.384 | 0.482              | 4470  | 0.457  | 0.507 | 0.314             | 3074  | 0.278  | 0.349 | 0.371                  | 3859  | 0.340  | 0.401 |
|            |     | 2.2   | 0.488                | 1034  | 0.435  | 0.538 | 0.374             | 5005  | 0.347  | 0.400 | 0.510              | 4470  | 0.485  | 0.534 | 0.353             | 3074  | 0.318  | 0.387 | 0.407                  | 3859  | 0.377  | 0.436 |
|            |     | 2.9   | 0.582                | 1034  | 0.535  | 0.625 | 0.502             | 5005  | 0.479  | 0.525 | 0.614              | 4470  | 0.593  | 0.634 | 0.470             | 3074  | 0.439  | 0.500 | 0.562                  | 3859  | 0.537  | 0.586 |
| 2.1        | 2.1 | 0.463 | 1661                 | 0.420 | 0.504  | 0.345 | 8326              | 0.324 | 0.366  | 0.465 | 7889               | 0.445 | 0.484  | 0.315 | 5149              | 0.287 | 0.342  | 0.389 | 5349                   | 0.363 | 0.414  |       |
|            | 2.4 | 0.505 | 1661                 | 0.464 | 0.544  | 0.356 | 8326              | 0.335 | 0.377  | 0.502 | 7889               | 0.483 | 0.520  | 0.360 | 5149              | 0.333 | 0.386  | 0.401 | 5349                   | 0.376 | 0.426  |       |
|            | 3.1 | 0.587 | 1661                 | 0.551 | 0.621  | 0.504 | 8326              | 0.486 | 0.522  | 0.616 | 7889               | 0.601 | 0.631  | 0.511 | 5149              | 0.488 | 0.533  | 0.575 | 5349                   | 0.555 | 0.595  |       |
| 20         | 1.7 | 1.7   | 0.412                | 320   | 0.306  | 0.509 | 0.349             | 1428  | 0.297  | 0.399 | 0.420              | 1010  | 0.362  | 0.475 | 0.191             | 892   | 0.120  | 0.261 | 0.378                  | 1710  | 0.332  | 0.422 |
|            |     | 2     | 0.445                | 320   | 0.341  | 0.538 | 0.390             | 1428  | 0.340  | 0.438 | 0.473              | 1010  | 0.418  | 0.525 | 0.228             | 892   | 0.157  | 0.296 | 0.432                  | 1710  | 0.388  | 0.474 |
|            |     | 2.7   | 0.604                | 320   | 0.520  | 0.676 | 0.527             | 1428  | 0.484  | 0.568 | 0.561              | 1010  | 0.512  | 0.606 | 0.369             | 892   | 0.304  | 0.431 | 0.550                  | 1710  | 0.512  | 0.586 |
|            | 1.9 | 1.9   | 0.454                | 437   | 0.367  | 0.534 | 0.349             | 2163  | 0.307  | 0.390 | 0.478              | 1601  | 0.435  | 0.519 | 0.248             | 1388  | 0.192  | 0.302 | 0.357                  | 2261  | 0.316  | 0.396 |
|            |     | 2.2   | 0.524                | 437   | 0.443  | 0.595 | 0.387             | 2163  | 0.346  | 0.426 | 0.509              | 1601  | 0.467  | 0.548 | 0.259             | 1388  | 0.203  | 0.313 | 0.385                  | 2261  | 0.345  | 0.423 |
|            |     | 2.9   | 0.629                | 437   | 0.561  | 0.688 | 0.520             | 2163  | 0.485  | 0.553 | 0.597              | 1601  | 0.561  | 0.631 | 0.417             | 1388  | 0.367  | 0.464 | 0.542                  | 2261  | 0.509  | 0.574 |
|            | 2.1 | 2.1   | 0.515                | 699   | 0.451  | 0.573 | 0.363             | 3564  | 0.331  | 0.394 | 0.499              | 2752  | 0.467  | 0.530 | 0.285             | 2242  | 0.242  | 0.327 | 0.365                  | 3052  | 0.330  | 0.399 |
|            |     | 2.4   | 0.538                | 699   | 0.477  | 0.594 | 0.391             | 3564  | 0.360  | 0.422 | 0.525              | 2752  | 0.494  | 0.555 | 0.324             | 2242  | 0.282  | 0.365 | 0.395                  | 3052  | 0.361  | 0.428 |
|            |     | 3.1   | 0.607                | 699   | 0.552  | 0.657 | 0.536             | 3564  | 0.509  | 0.562 | 0.624              | 2752  | 0.598  | 0.649 | 0.468             | 2242  | 0.431  | 0.503 | 0.585                  | 3052  | 0.558  | 0.610 |

Table S3: Alternate  $\text{Seg}$  parameters used to identify LCRs from DNA sequences in the five model organisms. Correlation coefficients and number of LCR data points are given for each parameter set.

| parameters |     |     | <i>S. cerevisiae</i> |      |        |       | <i>H. sapiens</i> |       |        |        | <i>A. thaliana</i> |       |        |       | <i>C. elegans</i> |       |        |       | <i>D. melanogaster</i> |       |        |       |
|------------|-----|-----|----------------------|------|--------|-------|-------------------|-------|--------|--------|--------------------|-------|--------|-------|-------------------|-------|--------|-------|------------------------|-------|--------|-------|
| W          | K1  | K2  | r                    | n    | 95% CI |       | r                 | n     | 95% CI |        | r                  | n     | 95% CI |       | r                 | n     | 95% CI |       | r                      | n     | 95% CI |       |
| 1          | 1.2 | 1   | 0.279                | 565  | 0.192  | 0.362 | 0.207             | 3663  | 0.172  | 0.241  | 0.220              | 3013  | 0.182  | 0.258 | 0.263             | 1205  | 0.203  | 0.321 | 0.184                  | 620   | 0.098  | 0.267 |
|            |     | 1.1 | 0.269                | 565  | 0.182  | 0.352 | 0.257             | 3663  | 0.223  | 0.290  | 0.238              | 3013  | 0.200  | 0.275 | 0.331             | 1205  | 0.274  | 0.386 | 0.113                  | 620   | 0.026  | 0.199 |
|            |     | 1.3 | 0.387                | 565  | 0.306  | 0.462 | 0.405             | 3663  | 0.374  | 0.435  | 0.414              | 3013  | 0.380  | 0.446 | 0.423             | 1205  | 0.370  | 0.473 | 0.230                  | 620   | 0.145  | 0.311 |
| 21         | 1.3 | 1.3 | 0.509                | 3175 | 0.480  | 0.537 | 0.478             | 12142 | 0.463  | 0.493  | 0.461              | 12706 | 0.446  | 0.476 | 0.469             | 8163  | 0.450  | 0.488 | 0.307                  | 3844  | 0.275  | 0.339 |
|            |     | 1.5 | 0.572                | 3175 | 0.545  | 0.598 | 0.557             | 12142 | 0.543  | 0.571  | 0.541              | 12706 | 0.527  | 0.555 | 0.521             | 8163  | 0.503  | 0.538 | 0.371                  | 3844  | 0.340  | 0.401 |
|            |     | 1.6 | 0.626                | 3175 | 0.602  | 0.649 | 0.622             | 12142 | 0.610  | 0.634  | 0.621              | 12706 | 0.609  | 0.633 | 0.588             | 8163  | 0.572  | 0.604 | 0.430                  | 3844  | 0.401  | 0.458 |
| 1.7        | 1.9 | 1.7 | 0.626                | 5982 | 0.609  | 0.643 | 0.606             | 19868 | 0.596  | 0.616  | 0.606              | 27407 | 0.598  | 0.614 | 0.578             | 19847 | 0.568  | 0.588 | 0.555                  | 13806 | 0.542  | 0.568 |
|            |     | 1.9 | 0.631                | 5982 | 0.614  | 0.648 | 0.602             | 19868 | 0.592  | 0.612  | 0.634              | 27407 | 0.626  | 0.642 | 0.614             | 19847 | 0.604  | 0.624 | 0.591                  | 13806 | 0.579  | 0.603 |
|            |     | 2   | 0.773                | 5982 | 0.761  | 0.784 | 0.740             | 19868 | 0.733  | 0.747  | 0.814              | 27407 | 0.809  | 0.818 | 0.773             | 19847 | 0.767  | 0.779 | 0.807                  | 13806 | 0.800  | 0.813 |
| 1          | 1.3 | 1   | 0.101                | 23   | -0.369 | 0.530 | -0.190            | 144   | -0.360 | -0.008 | 0.354              | 53    | 0.061  | 0.591 | 0.336             | 28    | -0.087 | 0.656 | 0.669                  | 12    | 0.081  | 0.912 |
|            |     | 1.2 | 0.094                | 23   | -0.375 | 0.525 | 0.111             | 144   | -0.072 | 0.287  | 0.439              | 53    | 0.161  | 0.653 | 0.683             | 28    | 0.378  | 0.854 | 0.526                  | 12    | -0.143 | 0.865 |
|            |     | 1.3 | 0.294                | 23   | -0.183 | 0.659 | 0.305             | 144   | 0.130  | 0.461  | 0.460              | 53    | 0.186  | 0.668 | 0.796             | 28    | 0.572  | 0.909 | 0.512                  | 12    | -0.161 | 0.860 |
| 45         | 1.3 | 1.3 | 0.379                | 171  | 0.226  | 0.513 | 0.433             | 1571  | 0.387  | 0.477  | 0.459              | 676   | 0.390  | 0.523 | 0.526             | 314   | 0.431  | 0.610 | 0.232                  | 182   | 0.073  | 0.380 |
|            |     | 1.5 | 0.428                | 171  | 0.281  | 0.555 | 0.579             | 1571  | 0.541  | 0.615  | 0.571              | 676   | 0.512  | 0.625 | 0.526             | 314   | 0.431  | 0.610 | 0.281                  | 182   | 0.125  | 0.424 |
|            |     | 1.7 | 0.528                | 171  | 0.396  | 0.639 | 0.649             | 1571  | 0.616  | 0.680  | 0.622              | 676   | 0.568  | 0.671 | 0.590             | 314   | 0.503  | 0.665 | 0.365                  | 182   | 0.216  | 0.497 |
| 1.7        | 1.9 | 1.7 | 0.623                | 4362 | 0.602  | 0.643 | 0.606             | 16102 | 0.595  | 0.617  | 0.617              | 18815 | 0.607  | 0.627 | 0.541             | 12953 | 0.527  | 0.554 | 0.443                  | 6721  | 0.421  | 0.464 |
|            |     | 1.9 | 0.740                | 4362 | 0.725  | 0.755 | 0.736             | 16102 | 0.728  | 0.744  | 0.748              | 18815 | 0.741  | 0.755 | 0.700             | 12953 | 0.690  | 0.710 | 0.612                  | 6721  | 0.595  | 0.628 |
|            |     | 2   | 0.850                | 4362 | 0.841  | 0.859 | 0.877             | 16102 | 0.873  | 0.881  | 0.902              | 18815 | 0.899  | 0.905 | 0.858             | 12953 | 0.853  | 0.863 | 0.859                  | 6721  | 0.852  | 0.866 |
| 1          | 1.3 | 1   | 0.214                | 10   | -0.543 | 0.779 | -0.156            | 46    | -0.455 | 0.174  | 0.788              | 15    | 0.410  | 0.935 | 0.732             | 8     | -0.044 | 0.957 | 0.620                  | 6     | -0.490 | 0.963 |
|            |     | 1.2 | 0.204                | 10   | -0.550 | 0.775 | 0.298             | 46    | -0.026 | 0.565  | 0.594              | 15    | 0.053  | 0.865 | 0.596             | 8     | -0.282 | 0.931 | 0.625                  | 6     | -0.484 | 0.964 |
|            |     | 1.3 | 0.381                | 10   | -0.401 | 0.842 | 0.242             | 46    | -0.086 | 0.523  | 0.707              | 15    | 0.245  | 0.907 | 0.297             | 8     | -0.586 | 0.857 | 0.746                  | 6     | -0.289 | 0.977 |
| 60         | 1.3 | 1.3 | 0.364                | 55   | 0.078  | 0.594 | 0.352             | 607   | 0.272  | 0.427  | 0.531              | 195   | 0.409  | 0.635 | 0.490             | 108   | 0.312  | 0.635 | 0.363                  | 38    | 0.011  | 0.635 |
|            |     | 1.5 | 0.434                | 55   | 0.160  | 0.646 | 0.573             | 607   | 0.510  | 0.630  | 0.584              | 195   | 0.471  | 0.678 | 0.607             | 108   | 0.455  | 0.725 | 0.227                  | 38    | -0.137 | 0.537 |
|            |     | 1.7 | 0.570                | 55   | 0.332  | 0.740 | 0.673             | 607   | 0.621  | 0.719  | 0.655              | 195   | 0.556  | 0.736 | 0.529             | 108   | 0.359  | 0.665 | 0.316                  | 38    | -0.042 | 0.602 |
| 1.7        | 1.9 | 1.7 | 0.634                | 2711 | 0.608  | 0.658 | 0.631             | 11069 | 0.618  | 0.643  | 0.628              | 10319 | 0.615  | 0.641 | 0.508             | 6909  | 0.488  | 0.527 | 0.420                  | 3493  | 0.389  | 0.450 |
|            |     | 1.9 | 0.759                | 2711 | 0.741  | 0.776 | 0.759             | 11069 | 0.750  | 0.768  | 0.761              | 10319 | 0.752  | 0.770 | 0.687             | 6909  | 0.673  | 0.701 | 0.601                  | 3493  | 0.577  | 0.624 |
|            |     | 2   | 0.852                | 2711 | 0.840  | 0.863 | 0.882             | 11069 | 0.877  | 0.887  | 0.901              | 10319 | 0.897  | 0.905 | 0.851             | 6909  | 0.844  | 0.858 | 0.853                  | 3493  | 0.843  | 0.863 |

Table S4: Alternate  $\text{Seg}$  parameters used to identify LCRs from (a) protein sequences and (b) DNA sequences in the Null simulated proteomes. Correlation coefficients, number of LCR data points, and 95% confidence intervals are given for each parameter set.

| (a)        |     |     |        |      |        |       | (b)        |     |     |       |       |        |       |
|------------|-----|-----|--------|------|--------|-------|------------|-----|-----|-------|-------|--------|-------|
| parameters |     |     | Null   |      |        |       | parameters |     |     | Null  |       |        |       |
| W          | K1  | K2  | r      | n    | 95% CI |       | W          | K1  | K2  | r     | n     | 95% CI |       |
|            |     | 1.7 | 0.162  | 203  | 0.009  | 0.308 |            |     | 1   | 0.200 | 64    | -0.077 | 0.448 |
|            | 1.7 | 2   | 0.222  | 203  | 0.071  | 0.363 |            | 1   | 1.2 | 0.308 | 64    | 0.039  | 0.536 |
|            |     | 2.7 | 0.485  | 203  | 0.358  | 0.594 |            |     | 1.3 | 0.473 | 64    | 0.230  | 0.660 |
|            |     | 1.9 | 0.319  | 1587 | 0.269  | 0.367 |            |     | 1.3 | 0.606 | 2211  | 0.576  | 0.635 |
| 12         | 1.9 | 2.2 | 0.351  | 1587 | 0.302  | 0.398 | 21         | 1.3 | 1.5 | 0.675 | 2211  | 0.649  | 0.700 |
|            |     | 2.9 | 0.533  | 1587 | 0.493  | 0.571 |            |     | 1.6 | 0.704 | 2211  | 0.680  | 0.727 |
|            |     | 2.1 | 0.318  | 7303 | 0.295  | 0.341 |            |     | 1.7 | 0.649 | 92462 | 0.645  | 0.653 |
|            | 2.1 | 2.4 | 0.369  | 7303 | 0.347  | 0.391 |            | 1.7 | 1.9 | 0.728 | 92462 | 0.725  | 0.731 |
|            |     | 3.1 | 0.597  | 7303 | 0.580  | 0.613 |            |     | 2   | 0.868 | 92462 | 0.866  | 0.870 |
|            |     | 1.7 | 0.652  | 18   | 0.211  | 0.872 |            |     | 1   | NA    | 0     | NA     | NA    |
|            | 1.7 | 2   | 0.658  | 18   | 0.221  | 0.875 |            | 1   | 1.2 | NA    | 0     | NA     | NA    |
|            |     | 2.7 | 0.188  | 18   | -0.357 | 0.638 |            |     | 1.3 | NA    | 0     | NA     | NA    |
|            |     | 1.9 | 0.217  | 70   | -0.046 | 0.452 |            |     | 1.3 | NA    | 1     | NA     | NA    |
| 15         | 1.9 | 2.2 | 0.126  | 70   | -0.139 | 0.374 | 45         | 1.3 | 1.5 | NA    | 1     | NA     | NA    |
|            |     | 2.9 | 0.323  | 70   | 0.068  | 0.538 |            |     | 1.6 | NA    | 1     | NA     | NA    |
|            |     | 2.1 | 0.211  | 638  | 0.127  | 0.292 |            |     | 1.7 | 0.645 | 2853  | 0.620  | 0.668 |
|            | 2.1 | 2.4 | 0.255  | 638  | 0.172  | 0.334 |            | 1.7 | 1.9 | 0.733 | 2853  | 0.713  | 0.751 |
|            |     | 3.1 | 0.447  | 638  | 0.375  | 0.514 |            |     | 2   | 0.825 | 2853  | 0.811  | 0.838 |
|            |     | 1.7 | NA     | 0    | NA     | NA    |            |     | 1   | NA    | 0     | NA     | NA    |
|            | 1.7 | 2   | NA     | 0    | NA     | NA    |            | 1   | 1.2 | NA    | 0     | NA     | NA    |
|            |     | 2.7 | NA     | 0    | NA     | NA    |            |     | 1.3 | NA    | 0     | NA     | NA    |
|            |     | 1.9 | -1.000 | 2    | NaN    | NaN   |            |     | 1.3 | NA    | 0     | NA     | NA    |
| 20         | 1.9 | 2.2 | -1.000 | 2    | NaN    | NaN   | 60         | 1.3 | 1.5 | NA    | 0     | NA     | NA    |
|            |     | 2.9 | 1.000  | 2    | NaN    | NaN   |            |     | 1.6 | NA    | 0     | NA     | NA    |
|            |     | 2.1 | 0.047  | 17   | -0.491 | 0.559 |            |     | 1.7 | 0.660 | 159   | 0.550  | 0.748 |
|            | 2.1 | 2.4 | 0.048  | 17   | -0.490 | 0.559 |            | 1.7 | 1.9 | 0.666 | 159   | 0.557  | 0.752 |
|            |     | 3.1 | 0.294  | 17   | -0.274 | 0.710 |            |     | 2   | 0.735 | 159   | 0.644  | 0.806 |

Table S5: Alternate  $\text{Seg}$  parameters used to identify LCRs from species specific Slip simulated protein sequences. Correlation coefficients, number of LCR data points, and 95% confidence intervals are given for each parameter set.

| parameters |     |     | <i>S. cerevisiae</i> |       |        |       | <i>H. sapiens</i> |       |        |       | <i>A. thaliana</i> |       |        |       | <i>C. elegans</i> |       |        |       | <i>D. melanogaster</i> |       |        |       |       |
|------------|-----|-----|----------------------|-------|--------|-------|-------------------|-------|--------|-------|--------------------|-------|--------|-------|-------------------|-------|--------|-------|------------------------|-------|--------|-------|-------|
| W          | K1  | K2  | r                    | n     | 95% CI |       | r                 | n     | 95% CI |       | r                  | n     | 95% CI |       | r                 | n     | 95% CI |       | r                      | n     | 95% CI |       |       |
| 1.7        | 1.7 | 1.7 | 0.543                | 24346 | 0.533  | 0.553 | 0.639             | 7042  | 0.623  | 0.654 | 0.578              | 14052 | 0.566  | 0.590 | 0.536             | 15094 | 0.523  | 0.549 | 0.582                  | 18911 | 0.571  | 0.592 |       |
|            |     | 2   | 0.574                | 24346 | 0.565  | 0.583 | 0.658             | 7042  | 0.643  | 0.673 | 0.605              | 14052 | 0.593  | 0.617 | 0.562             | 15094 | 0.550  | 0.574 | 0.610                  | 18911 | 0.600  | 0.620 |       |
|            |     | 2.7 | 0.629                | 24346 | 0.620  | 0.637 | 0.690             | 7042  | 0.676  | 0.703 | 0.650              | 14052 | 0.639  | 0.661 | 0.608             | 15094 | 0.597  | 0.619 | 0.652                  | 18911 | 0.643  | 0.661 |       |
|            | 12  | 1.9 | 1.9                  | 0.661 | 37295  | 0.655 | 0.667             | 0.726 | 17604  | 0.718 | 0.734              | 0.691 | 24174  | 0.684 | 0.698             | 0.655 | 24552  | 0.647 | 0.663                  | 0.688 | 30851  | 0.681 | 0.694 |
|            |     |     | 2.2                  | 0.680 | 37295  | 0.674 | 0.686             | 0.738 | 17604  | 0.730 | 0.745              | 0.708 | 24174  | 0.701 | 0.715             | 0.673 | 24552  | 0.665 | 0.681                  | 0.706 | 30851  | 0.700 | 0.712 |
|            |     |     | 2.9                  | 0.728 | 37295  | 0.723 | 0.733             | 0.759 | 17604  | 0.752 | 0.766              | 0.742 | 24174  | 0.736 | 0.748             | 0.712 | 24552  | 0.705 | 0.719                  | 0.743 | 30851  | 0.737 | 0.749 |
|            | 2.1 | 2.1 | 2.1                  | 0.743 | 57393  | 0.739 | 0.747             | 0.749 | 41835  | 0.744 | 0.754              | 0.763 | 43014  | 0.759 | 0.767             | 0.743 | 40865  | 0.738 | 0.748                  | 0.765 | 50823  | 0.761 | 0.769 |
|            |     |     | 2.4                  | 0.756 | 57393  | 0.752 | 0.760             | 0.756 | 41835  | 0.751 | 0.761              | 0.774 | 43014  | 0.770 | 0.778             | 0.755 | 40865  | 0.750 | 0.760                  | 0.778 | 50823  | 0.774 | 0.782 |
|            |     |     | 3.1                  | 0.800 | 57393  | 0.797 | 0.803             | 0.769 | 41835  | 0.765 | 0.773              | 0.800 | 43014  | 0.796 | 0.804             | 0.787 | 40865  | 0.783 | 0.791                  | 0.807 | 50823  | 0.804 | 0.810 |
| 1.7        | 2   | 1.7 | 0.459                | 12507 | 0.443  | 0.474 | 0.535             | 2062  | 0.500  | 0.568 | 0.484              | 6281  | 0.463  | 0.505 | 0.450             | 7002  | 0.429  | 0.471 | 0.498                  | 8847  | 0.480  | 0.515 |       |
|            |     | 2   | 0.484                | 12507 | 0.469  | 0.499 | 0.552             | 2062  | 0.518  | 0.585 | 0.504              | 6281  | 0.483  | 0.524 | 0.472             | 7002  | 0.451  | 0.492 | 0.518                  | 8847  | 0.501  | 0.535 |       |
|            |     | 2.7 | 0.530                | 12507 | 0.516  | 0.544 | 0.600             | 2062  | 0.568  | 0.630 | 0.548              | 6281  | 0.528  | 0.567 | 0.514             | 7002  | 0.495  | 0.533 | 0.560                  | 8847  | 0.544  | 0.576 |       |
| 15         | 1.9 | 1.9 | 0.539                | 17239 | 0.527  | 0.551 | 0.638             | 3765  | 0.616  | 0.659 | 0.569              | 9274  | 0.553  | 0.584 | 0.520             | 10087 | 0.504  | 0.536 | 0.570                  | 12577 | 0.557  | 0.583 |       |
|            |     | 2.2 | 0.566                | 17239 | 0.555  | 0.577 | 0.658             | 3765  | 0.637  | 0.678 | 0.594              | 9274  | 0.579  | 0.608 | 0.547             | 10087 | 0.532  | 0.562 | 0.596                  | 12577 | 0.583  | 0.608 |       |
|            |     | 2.9 | 0.618                | 17239 | 0.608  | 0.628 | 0.689             | 3765  | 0.670  | 0.707 | 0.638              | 9274  | 0.624  | 0.651 | 0.594             | 10087 | 0.580  | 0.608 | 0.637                  | 12577 | 0.625  | 0.648 |       |
| 2.1        | 2.1 | 2.1 | 0.654                | 24896 | 0.646  | 0.662 | 0.739             | 8510  | 0.728  | 0.750 | 0.688              | 14729 | 0.678  | 0.697 | 0.639             | 15109 | 0.628  | 0.649 | 0.678                  | 19109 | 0.669  | 0.686 |       |
|            |     | 2.4 | 0.674                | 24896 | 0.666  | 0.681 | 0.752             | 8510  | 0.742  | 0.762 | 0.704              | 14729 | 0.695  | 0.713 | 0.657             | 15109 | 0.647  | 0.667 | 0.696                  | 19109 | 0.688  | 0.704 |       |
|            |     | 3.1 | 0.720                | 24896 | 0.713  | 0.727 | 0.769             | 8510  | 0.759  | 0.779 | 0.737              | 14729 | 0.729  | 0.745 | 0.697             | 15109 | 0.688  | 0.706 | 0.733                  | 19109 | 0.726  | 0.740 |       |
| 1.7        | 2   | 1.7 | 0.343                | 4821  | 0.315  | 0.370 | 0.393             | 369   | 0.292  | 0.485 | 0.365              | 2100  | 0.323  | 0.406 | 0.342             | 2424  | 0.302  | 0.381 | 0.377                  | 2988  | 0.342  | 0.411 |       |
|            |     | 2   | 0.363                | 4821  | 0.335  | 0.390 | 0.417             | 369   | 0.318  | 0.507 | 0.379              | 2100  | 0.337  | 0.419 | 0.357             | 2424  | 0.318  | 0.395 | 0.397                  | 2988  | 0.363  | 0.430 |       |
|            |     | 2.7 | 0.397                | 4821  | 0.370  | 0.423 | 0.461             | 369   | 0.367  | 0.546 | 0.412              | 2100  | 0.372  | 0.451 | 0.383             | 2424  | 0.344  | 0.420 | 0.425                  | 2988  | 0.392  | 0.457 |       |
| 20         | 1.9 | 1.9 | 0.413                | 6253  | 0.390  | 0.436 | 0.474             | 600   | 0.402  | 0.540 | 0.429              | 2773  | 0.395  | 0.462 | 0.408             | 3212  | 0.375  | 0.440 | 0.437                  | 4030  | 0.409  | 0.464 |       |
|            |     | 2.2 | 0.435                | 6253  | 0.412  | 0.457 | 0.488             | 600   | 0.417  | 0.553 | 0.449              | 2773  | 0.415  | 0.482 | 0.426             | 3212  | 0.394  | 0.457 | 0.454                  | 4030  | 0.426  | 0.481 |       |
|            |     | 2.9 | 0.472                | 6253  | 0.450  | 0.493 | 0.531             | 600   | 0.464  | 0.592 | 0.485              | 2773  | 0.453  | 0.516 | 0.449             | 3212  | 0.418  | 0.479 | 0.491                  | 4030  | 0.464  | 0.517 |       |
| 2.1        | 2.1 | 2.1 | 0.496                | 8816  | 0.478  | 0.513 | 0.592             | 1131  | 0.548  | 0.633 | 0.525              | 4191  | 0.500  | 0.549 | 0.488             | 4649  | 0.463  | 0.512 | 0.532                  | 5869  | 0.511  | 0.552 |       |
|            |     | 2.4 | 0.523                | 8816  | 0.506  | 0.540 | 0.609             | 1131  | 0.566  | 0.648 | 0.548              | 4191  | 0.524  | 0.571 | 0.504             | 4649  | 0.480  | 0.528 | 0.554                  | 5869  | 0.534  | 0.573 |       |
|            |     | 3.1 | 0.568                | 8816  | 0.552  | 0.584 | 0.643             | 1131  | 0.603  | 0.680 | 0.588              | 4191  | 0.565  | 0.610 | 0.541             | 4649  | 0.518  | 0.563 | 0.589                  | 5869  | 0.570  | 0.607 |       |

Table S6: Alternate  $S_{seg}$  parameters used to identify LCRs from species specific Slip simulated DNA sequences. Correlation coefficients, number of LCR data points, and 95% confidence intervals are given for each parameter set.

| parameters |     |     | <i>S. cerevisiae</i> |        |        | <i>H. sapiens</i> |       |        | <i>A. thaliana</i> |       |        | <i>C. elegans</i> |       |        | <i>D. melanogaster</i> |        |        |       |       |        |       |       |
|------------|-----|-----|----------------------|--------|--------|-------------------|-------|--------|--------------------|-------|--------|-------------------|-------|--------|------------------------|--------|--------|-------|-------|--------|-------|-------|
| W          | K1  | K2  | r                    | n      | 95% CI | r                 | n     | 95% CI | r                  | n     | 95% CI | r                 | n     | 95% CI | r                      | n      | 95% CI |       |       |        |       |       |
| 1          | 1   | 1   | 0.311                | 30077  | 0.300  | 0.322             | 0.392 | 8091   | 0.371              | 0.412 | 0.286  | 15254             | 0.270 | 0.302  | 0.286                  | 17855  | 0.271  | 0.301 | 0.195 | 15938  | 0.178 | 0.212 |
|            |     | 1.2 | 0.375                | 30077  | 0.364  | 0.386             | 0.428 | 8091   | 0.408              | 0.448 | 0.329  | 15254             | 0.313 | 0.345  | 0.340                  | 17855  | 0.325  | 0.354 | 0.244 | 15938  | 0.228 | 0.260 |
|            |     | 1.3 | 0.454                | 30077  | 0.444  | 0.464             | 0.488 | 8091   | 0.469              | 0.506 | 0.400  | 15254             | 0.385 | 0.415  | 0.414                  | 17855  | 0.400  | 0.427 | 0.337 | 15938  | 0.322 | 0.352 |
| 21         | 1.3 | 1.3 | 0.685                | 71346  | 0.681  | 0.689             | 0.709 | 35126  | 0.703              | 0.715 | 0.662  | 42112             | 0.656 | 0.668  | 0.671                  | 47726  | 0.665  | 0.676 | 0.605 | 36893  | 0.598 | 0.612 |
|            |     | 1.5 | 0.748                | 71346  | 0.744  | 0.752             | 0.759 | 35126  | 0.754              | 0.764 | 0.721  | 42112             | 0.716 | 0.726  | 0.728                  | 47726  | 0.723  | 0.733 | 0.684 | 36893  | 0.678 | 0.690 |
|            |     | 1.6 | 0.781                | 71346  | 0.778  | 0.784             | 0.783 | 35126  | 0.778              | 0.787 | 0.750  | 42112             | 0.745 | 0.755  | 0.758                  | 47726  | 0.754  | 0.762 | 0.720 | 36893  | 0.714 | 0.725 |
| 1.7        | 1.9 | 1.7 | 0.748                | 100000 | 0.745  | 0.751             | 0.638 | 100000 | 0.634              | 0.642 | 0.719  | 100000            | 0.716 | 0.722  | 0.734                  | 100000 | 0.731  | 0.737 | 0.732 | 100000 | 0.729 | 0.735 |
|            |     | 1.9 | 0.743                | 100000 | 0.740  | 0.746             | 0.602 | 100000 | 0.598              | 0.606 | 0.709  | 100000            | 0.706 | 0.712  | 0.724                  | 100000 | 0.721  | 0.727 | 0.731 | 100000 | 0.728 | 0.734 |
|            |     | 2   | 0.289                | 100000 | 0.283  | 0.295             | 0.630 | 100000 | 0.626              | 0.634 | 0.519  | 100000            | 0.514 | 0.524  | 0.436                  | 100000 | 0.430  | 0.442 | 0.595 | 100000 | 0.591 | 0.599 |
| 1          | 1.2 | 1   | 0.193                | 3187   | 0.155  | 0.230             | 0.313 | 154    | 0.145              | 0.463 | 0.179  | 1092              | 0.114 | 0.242  | 0.205                  | 1434   | 0.149  | 0.260 | 0.144 | 1352   | 0.085 | 0.202 |
|            |     | 1.2 | 0.301                | 3187   | 0.265  | 0.336             | 0.351 | 154    | 0.187              | 0.496 | 0.271  | 1092              | 0.209 | 0.331  | 0.289                  | 1434   | 0.235  | 0.341 | 0.237 | 1352   | 0.180 | 0.292 |
|            |     | 1.3 | 0.342                | 3187   | 0.307  | 0.376             | 0.351 | 154    | 0.187              | 0.496 | 0.301  | 1092              | 0.240 | 0.360  | 0.312                  | 1434   | 0.259  | 0.363 | 0.261 | 1352   | 0.205 | 0.316 |
| 45         | 1.3 | 1.3 | 0.537                | 6615   | 0.518  | 0.556             | 0.533 | 488    | 0.458              | 0.600 | 0.453  | 2290              | 0.416 | 0.489  | 0.473                  | 3034   | 0.442  | 0.503 | 0.395 | 2664   | 0.359 | 0.430 |
|            |     | 1.5 | 0.591                | 6615   | 0.573  | 0.608             | 0.573 | 488    | 0.503              | 0.636 | 0.492  | 2290              | 0.457 | 0.526  | 0.514                  | 3034   | 0.484  | 0.543 | 0.427 | 2664   | 0.392 | 0.461 |
|            |     | 1.6 | 0.610                | 6615   | 0.593  | 0.627             | 0.580 | 488    | 0.510              | 0.642 | 0.505  | 2290              | 0.470 | 0.538  | 0.529                  | 3034   | 0.500  | 0.557 | 0.437 | 2664   | 0.402 | 0.471 |
| 1.7        | 1.9 | 1.7 | 0.837                | 85352  | 0.835  | 0.839             | 0.868 | 37583  | 0.865              | 0.871 | 0.850  | 44526             | 0.847 | 0.853  | 0.855                  | 52501  | 0.852  | 0.858 | 0.835 | 39088  | 0.832 | 0.838 |
|            |     | 1.9 | 0.884                | 85352  | 0.882  | 0.886             | 0.889 | 37583  | 0.887              | 0.891 | 0.876  | 44526             | 0.874 | 0.878  | 0.883                  | 52501  | 0.881  | 0.885 | 0.864 | 39088  | 0.861 | 0.867 |
|            |     | 2   | 0.935                | 85352  | 0.934  | 0.936             | 0.945 | 37583  | 0.944              | 0.946 | 0.944  | 44526             | 0.943 | 0.945  | 0.946                  | 52501  | 0.945  | 0.947 | 0.938 | 39088  | 0.937 | 0.939 |
| 1          | 1.2 | 1   | 0.200                | 1419   | 0.144  | 0.255             | 0.352 | 35     | -0.018             | 0.637 | 0.225  | 439               | 0.124 | 0.322  | 0.183                  | 565    | 0.093  | 0.270 | 0.198 | 561    | 0.108 | 0.285 |
|            |     | 1.2 | 0.288                | 1419   | 0.234  | 0.340             | 0.428 | 35     | 0.071              | 0.688 | 0.295  | 439               | 0.197 | 0.387  | 0.258                  | 565    | 0.170  | 0.342 | 0.265 | 561    | 0.177 | 0.349 |
|            |     | 1.3 | 0.315                | 1419   | 0.262  | 0.366             | 0.428 | 35     | 0.071              | 0.688 | 0.311  | 439               | 0.214 | 0.402  | 0.258                  | 565    | 0.170  | 0.342 | 0.272 | 561    | 0.184 | 0.355 |
| 60         | 1.3 | 1.3 | 0.456                | 2773   | 0.423  | 0.488             | 0.508 | 113    | 0.338              | 0.646 | 0.380  | 878               | 0.315 | 0.441  | 0.406                  | 1135   | 0.350  | 0.459 | 0.331 | 1041   | 0.269 | 0.390 |
|            |     | 1.5 | 0.490                | 2773   | 0.458  | 0.521             | 0.531 | 113    | 0.366              | 0.664 | 0.391  | 878               | 0.327 | 0.452  | 0.430                  | 1135   | 0.376  | 0.481 | 0.359 | 1041   | 0.299 | 0.417 |
|            |     | 1.6 | 0.502                | 2773   | 0.470  | 0.532             | 0.531 | 113    | 0.366              | 0.664 | 0.402  | 878               | 0.338 | 0.462  | 0.444                  | 1135   | 0.390  | 0.495 | 0.361 | 1041   | 0.301 | 0.418 |
| 1.7        | 1.9 | 1.7 | 0.875                | 42378  | 0.872  | 0.877             | 0.887 | 5849   | 0.881              | 0.893 | 0.840  | 11511             | 0.834 | 0.846  | 0.856                  | 16008  | 0.851  | 0.861 | 0.794 | 9491   | 0.786 | 0.802 |
|            |     | 1.9 | 0.901                | 42378  | 0.899  | 0.903             | 0.899 | 5849   | 0.893              | 0.904 | 0.859  | 11511             | 0.854 | 0.864  | 0.875                  | 16008  | 0.871  | 0.879 | 0.820 | 9491   | 0.813 | 0.827 |
|            |     | 2   | 0.947                | 42378  | 0.946  | 0.948             | 0.935 | 5849   | 0.931              | 0.938 | 0.925  | 11511             | 0.922 | 0.928  | 0.939                  | 16008  | 0.937  | 0.941 | 0.901 | 9491   | 0.897 | 0.905 |

Table S7: Alternate  $\text{seg}$  parameters used to identify LCRs from species specific Slip+Syn simulated protein sequences. Correlation coefficients, number of LCR data points, and 95% confidence intervals are given for each parameter set.

| parameters |     |     | <i>S. cerevisiae</i> |       |        |       | <i>H. sapiens</i> |       |        |       | <i>A. thaliana</i> |       |        |       | <i>C. elegans</i> |       |        |       | <i>D. melanogaster</i> |       |        |       |
|------------|-----|-----|----------------------|-------|--------|-------|-------------------|-------|--------|-------|--------------------|-------|--------|-------|-------------------|-------|--------|-------|------------------------|-------|--------|-------|
| W          | K1  | K2  | r                    | n     | 95% CI |       | r                 | n     | 95% CI |       | r                  | n     | 95% CI |       | r                 | n     | 95% CI |       | r                      | n     | 95% CI |       |
| 12         | 1.7 | 1.7 | 0.431                | 24346 | 0.42   | 0.442 | 0.548             | 7042  | 0.53   | 0.566 | 0.452              | 14052 | 0.437  | 0.467 | 0.438             | 15094 | 0.424  | 0.452 | 0.462                  | 18911 | 0.449  | 0.474 |
|            |     | 2   | 0.465                | 24346 | 0.454  | 0.476 | 0.571             | 7042  | 0.553  | 0.588 | 0.483              | 14052 | 0.469  | 0.497 | 0.467             | 15094 | 0.453  | 0.481 | 0.492                  | 18911 | 0.48   | 0.504 |
|            |     | 2.7 | 0.531                | 24346 | 0.521  | 0.541 | 0.618             | 7042  | 0.602  | 0.634 | 0.54               | 14052 | 0.527  | 0.553 | 0.522             | 15094 | 0.509  | 0.535 | 0.544                  | 18911 | 0.533  | 0.555 |
|            | 1.9 | 1.9 | 0.555                | 37295 | 0.547  | 0.563 | 0.65              | 17604 | 0.64   | 0.659 | 0.573              | 24174 | 0.563  | 0.582 | 0.562             | 24552 | 0.552  | 0.571 | 0.579                  | 30851 | 0.571  | 0.587 |
|            |     | 2.2 | 0.58                 | 37295 | 0.572  | 0.587 | 0.667             | 17604 | 0.658  | 0.676 | 0.595              | 24174 | 0.586  | 0.604 | 0.584             | 24552 | 0.575  | 0.593 | 0.6                    | 30851 | 0.592  | 0.608 |
|            |     | 2.9 | 0.647                | 37295 | 0.64   | 0.654 | 0.706             | 17604 | 0.698  | 0.714 | 0.652              | 24174 | 0.644  | 0.66  | 0.639             | 24552 | 0.631  | 0.647 | 0.656                  | 30851 | 0.649  | 0.663 |
|            | 2.1 | 2.1 | 0.653                | 57393 | 0.648  | 0.658 | 0.683             | 41835 | 0.677  | 0.689 | 0.665              | 43014 | 0.659  | 0.671 | 0.661             | 40865 | 0.655  | 0.667 | 0.67                   | 50823 | 0.665  | 0.675 |
|            |     | 2.4 | 0.673                | 57393 | 0.668  | 0.678 | 0.698             | 41835 | 0.692  | 0.703 | 0.683              | 43014 | 0.677  | 0.689 | 0.68              | 40865 | 0.674  | 0.686 | 0.69                   | 50823 | 0.685  | 0.695 |
|            |     | 3.1 | 0.749                | 57393 | 0.745  | 0.753 | 0.742             | 41835 | 0.737  | 0.747 | 0.744              | 43014 | 0.739  | 0.749 | 0.742             | 40865 | 0.737  | 0.747 | 0.75                   | 50823 | 0.746  | 0.754 |
| 15         | 1.7 | 1.7 | 0.357                | 12507 | 0.34   | 0.374 | 0.462             | 2062  | 0.423  | 0.499 | 0.369              | 6281  | 0.345  | 0.393 | 0.358             | 7002  | 0.335  | 0.381 | 0.38                   | 8847  | 0.36   | 0.4   |
|            |     | 2   | 0.381                | 12507 | 0.364  | 0.398 | 0.48              | 2062  | 0.442  | 0.516 | 0.388              | 6281  | 0.364  | 0.411 | 0.381             | 7002  | 0.358  | 0.403 | 0.399                  | 8847  | 0.379  | 0.418 |
|            |     | 2.7 | 0.43                 | 12507 | 0.414  | 0.446 | 0.536             | 2062  | 0.501  | 0.569 | 0.435              | 6281  | 0.412  | 0.457 | 0.422             | 7002  | 0.4    | 0.443 | 0.445                  | 8847  | 0.426  | 0.463 |
|            | 1.9 | 1.9 | 0.431                | 17239 | 0.417  | 0.444 | 0.557             | 3765  | 0.532  | 0.581 | 0.448              | 9274  | 0.43   | 0.466 | 0.427             | 10087 | 0.409  | 0.445 | 0.451                  | 12577 | 0.435  | 0.466 |
|            |     | 2.2 | 0.459                | 17239 | 0.446  | 0.472 | 0.585             | 3765  | 0.561  | 0.608 | 0.475              | 9274  | 0.457  | 0.492 | 0.457             | 10087 | 0.44   | 0.474 | 0.48                   | 12577 | 0.465  | 0.495 |
|            |     | 2.9 | 0.519                | 17239 | 0.507  | 0.531 | 0.628             | 3765  | 0.606  | 0.649 | 0.528              | 9274  | 0.511  | 0.544 | 0.507             | 10087 | 0.491  | 0.523 | 0.529                  | 12577 | 0.515  | 0.543 |
|            | 2.1 | 2.1 | 0.548                | 24896 | 0.538  | 0.558 | 0.667             | 8510  | 0.654  | 0.68  | 0.568              | 14729 | 0.556  | 0.58  | 0.545             | 15109 | 0.532  | 0.557 | 0.567                  | 19109 | 0.556  | 0.578 |
|            |     | 2.4 | 0.572                | 24896 | 0.563  | 0.581 | 0.685             | 8510  | 0.672  | 0.697 | 0.591              | 14729 | 0.579  | 0.603 | 0.566             | 15109 | 0.554  | 0.578 | 0.588                  | 19109 | 0.578  | 0.598 |
|            |     | 3.1 | 0.635                | 24896 | 0.627  | 0.643 | 0.719             | 8510  | 0.707  | 0.73  | 0.641              | 14729 | 0.63   | 0.651 | 0.619             | 15109 | 0.608  | 0.63  | 0.64                   | 19109 | 0.631  | 0.649 |
| 20         | 1.7 | 1.7 | 0.26                 | 4821  | 0.23   | 0.289 | 0.301             | 369   | 0.194  | 0.401 | 0.27               | 2100  | 0.225  | 0.314 | 0.259             | 2424  | 0.217  | 0.3   | 0.283                  | 2988  | 0.246  | 0.319 |
|            |     | 2   | 0.277                | 4821  | 0.248  | 0.306 | 0.326             | 369   | 0.22   | 0.424 | 0.284              | 2100  | 0.24   | 0.327 | 0.272             | 2424  | 0.23   | 0.313 | 0.303                  | 2988  | 0.266  | 0.339 |
|            |     | 2.7 | 0.31                 | 4821  | 0.281  | 0.338 | 0.374             | 369   | 0.272  | 0.468 | 0.314              | 2100  | 0.27   | 0.356 | 0.298             | 2424  | 0.257  | 0.338 | 0.328                  | 2988  | 0.292  | 0.363 |
|            | 1.9 | 1.9 | 0.323                | 6253  | 0.298  | 0.348 | 0.393             | 600   | 0.315  | 0.466 | 0.327              | 2773  | 0.289  | 0.364 | 0.321             | 3212  | 0.286  | 0.355 | 0.335                  | 4030  | 0.304  | 0.365 |
|            |     | 2.2 | 0.343                | 6253  | 0.318  | 0.367 | 0.408             | 600   | 0.331  | 0.48  | 0.347              | 2773  | 0.31   | 0.383 | 0.337             | 3212  | 0.302  | 0.371 | 0.355                  | 4030  | 0.325  | 0.385 |
|            |     | 2.9 | 0.38                 | 6253  | 0.356  | 0.403 | 0.453             | 600   | 0.379  | 0.521 | 0.38               | 2773  | 0.344  | 0.415 | 0.362             | 3212  | 0.328  | 0.395 | 0.388                  | 4030  | 0.358  | 0.417 |
|            | 2.1 | 2.1 | 0.393                | 8816  | 0.373  | 0.412 | 0.523             | 1131  | 0.474  | 0.569 | 0.411              | 4191  | 0.383  | 0.439 | 0.397             | 4649  | 0.37   | 0.424 | 0.416                  | 5869  | 0.392  | 0.439 |
|            |     | 2.4 | 0.421                | 8816  | 0.402  | 0.44  | 0.542             | 1131  | 0.494  | 0.586 | 0.436              | 4191  | 0.408  | 0.463 | 0.413             | 4649  | 0.386  | 0.439 | 0.44                   | 5869  | 0.417  | 0.463 |
|            |     | 3.1 | 0.469                | 8816  | 0.451  | 0.487 | 0.583             | 1131  | 0.538  | 0.624 | 0.478              | 4191  | 0.452  | 0.504 | 0.454             | 4649  | 0.428  | 0.479 | 0.479                  | 5869  | 0.457  | 0.501 |

Table S8: Alternate  $S_{seg}$  parameters used to identify LCRs from species specific Slip+Syn simulated DNA sequences. Correlation coefficients, number of LCR data points, and 95% confidence intervals are given for each parameter set.

| parameters |     |     | <i>S. cerevisiae</i> |        |        |       | <i>H. sapiens</i> |        |        |       | <i>A. thaliana</i> |        |        |       | <i>C. elegans</i> |        |        |       | <i>D. melanogaster</i> |        |        |       |
|------------|-----|-----|----------------------|--------|--------|-------|-------------------|--------|--------|-------|--------------------|--------|--------|-------|-------------------|--------|--------|-------|------------------------|--------|--------|-------|
| W          | K1  | K2  | r                    | n      | 95% CI |       | r                 | n      | 95% CI |       | r                  | n      | 95% CI |       | r                 | n      | 95% CI |       | r                      | n      | 95% CI |       |
| 1          | 1.2 | 1   | 0.351                | 15258  | 0.335  | 0.366 | 0.371             | 4586   | 0.343  | 0.399 | 0.336              | 8132   | 0.314  | 0.357 | 0.317             | 9039   | 0.296  | 0.338 | 0.279                  | 9185   | 0.258  | 0.300 |
|            |     | 1.2 | 0.398                | 15258  | 0.383  | 0.413 | 0.399             | 4586   | 0.371  | 0.426 | 0.369              | 8132   | 0.348  | 0.390 | 0.350             | 9039   | 0.330  | 0.370 | 0.309                  | 9185   | 0.288  | 0.329 |
|            |     | 1.3 | 0.473                | 15258  | 0.459  | 0.487 | 0.487             | 4586   | 0.462  | 0.512 | 0.454              | 8132   | 0.435  | 0.473 | 0.435             | 9039   | 0.416  | 0.453 | 0.410                  | 9185   | 0.391  | 0.429 |
| 21         | 1.3 | 1.3 | 0.602                | 51110  | 0.596  | 0.608 | 0.651             | 29814  | 0.644  | 0.658 | 0.617              | 31451  | 0.609  | 0.625 | 0.602             | 34230  | 0.594  | 0.609 | 0.578                  | 34035  | 0.570  | 0.586 |
|            |     | 1.5 | 0.664                | 51110  | 0.659  | 0.669 | 0.707             | 29814  | 0.700  | 0.713 | 0.672              | 31451  | 0.665  | 0.679 | 0.657             | 34230  | 0.650  | 0.664 | 0.638                  | 34035  | 0.631  | 0.645 |
|            |     | 1.6 | 0.704                | 51110  | 0.699  | 0.709 | 0.740             | 29814  | 0.734  | 0.745 | 0.707              | 31451  | 0.701  | 0.713 | 0.693             | 34230  | 0.687  | 0.699 | 0.677                  | 34035  | 0.671  | 0.683 |
| 1.7        | 1.9 | 1.7 | 0.713                | 100000 | 0.710  | 0.716 | 0.609             | 100000 | 0.604  | 0.613 | 0.675              | 100000 | 0.671  | 0.679 | 0.695             | 100000 | 0.691  | 0.699 | 0.677                  | 100000 | 0.673  | 0.681 |
|            |     | 1.9 | 0.722                | 100000 | 0.719  | 0.725 | 0.578             | 100000 | 0.573  | 0.583 | 0.675              | 100000 | 0.671  | 0.679 | 0.705             | 100000 | 0.702  | 0.708 | 0.676                  | 100000 | 0.672  | 0.680 |
|            |     | 2   | 0.596                | 100000 | 0.592  | 0.600 | 0.580             | 100000 | 0.575  | 0.584 | 0.669              | 100000 | 0.665  | 0.673 | 0.695             | 100000 | 0.691  | 0.699 | 0.619                  | 100000 | 0.615  | 0.623 |
| 1          | 1.2 | 1   | 0.245                | 1338   | 0.188  | 0.300 | 0.303             | 73     | 0.052  | 0.518 | 0.200              | 497    | 0.104  | 0.292 | 0.197             | 610    | 0.110  | 0.281 | 0.135                  | 624    | 0.048  | 0.220 |
|            |     | 1.2 | 0.340                | 1338   | 0.286  | 0.392 | 0.365             | 73     | 0.121  | 0.567 | 0.293              | 497    | 0.201  | 0.380 | 0.330             | 610    | 0.249  | 0.407 | 0.261                  | 624    | 0.178  | 0.341 |
|            |     | 1.3 | 0.391                | 1338   | 0.339  | 0.440 | 0.446             | 73     | 0.215  | 0.630 | 0.352              | 497    | 0.263  | 0.435 | 0.371             | 610    | 0.292  | 0.445 | 0.352                  | 624    | 0.273  | 0.426 |
| 45         | 1.3 | 1.3 | 0.419                | 3315   | 0.387  | 0.450 | 0.496             | 260    | 0.387  | 0.592 | 0.428              | 1255   | 0.376  | 0.477 | 0.368             | 1564   | 0.319  | 0.415 | 0.388                  | 1553   | 0.340  | 0.434 |
|            |     | 1.5 | 0.517                | 3315   | 0.489  | 0.544 | 0.588             | 260    | 0.492  | 0.670 | 0.513              | 1255   | 0.466  | 0.557 | 0.445             | 1564   | 0.400  | 0.488 | 0.475                  | 1553   | 0.431  | 0.517 |
|            |     | 1.6 | 0.558                | 3315   | 0.531  | 0.584 | 0.605             | 260    | 0.511  | 0.684 | 0.549              | 1255   | 0.504  | 0.591 | 0.474             | 1564   | 0.430  | 0.516 | 0.512                  | 1553   | 0.470  | 0.552 |
| 1.7        | 1.9 | 1.7 | 0.812                | 58431  | 0.809  | 0.815 | 0.834             | 33600  | 0.830  | 0.837 | 0.824              | 31815  | 0.820  | 0.828 | 0.824             | 35489  | 0.820  | 0.828 | 0.800                  | 36624  | 0.796  | 0.804 |
|            |     | 1.9 | 0.857                | 58431  | 0.855  | 0.859 | 0.870             | 33600  | 0.867  | 0.873 | 0.856              | 31815  | 0.853  | 0.859 | 0.858             | 35489  | 0.855  | 0.861 | 0.841                  | 36624  | 0.838  | 0.844 |
|            |     | 2   | 0.948                | 58431  | 0.947  | 0.949 | 0.951             | 33600  | 0.950  | 0.952 | 0.933              | 31815  | 0.931  | 0.935 | 0.939             | 35489  | 0.938  | 0.940 | 0.935                  | 36624  | 0.934  | 0.936 |
| 1          | 1.2 | 1   | 0.176                | 602    | 0.088  | 0.261 | 0.125             | 17     | -0.428 | 0.611 | 0.161              | 204    | 0.008  | 0.306 | 0.158             | 262    | 0.024  | 0.287 | 0.129                  | 260    | -0.007 | 0.260 |
|            |     | 1.2 | 0.274                | 602    | 0.190  | 0.354 | 0.405             | 17     | -0.153 | 0.767 | 0.214              | 204    | 0.063  | 0.355 | 0.317             | 262    | 0.190  | 0.433 | 0.280                  | 260    | 0.150  | 0.400 |
|            |     | 1.3 | 0.303                | 602    | 0.220  | 0.382 | 0.405             | 17     | -0.153 | 0.767 | 0.211              | 204    | 0.060  | 0.353 | 0.347             | 262    | 0.222  | 0.460 | 0.312                  | 260    | 0.184  | 0.429 |
| 60         | 1.3 | 1.3 | 0.351                | 1355   | 0.298  | 0.402 | 0.491             | 57     | 0.236  | 0.683 | 0.305              | 480    | 0.212  | 0.393 | 0.305             | 615    | 0.223  | 0.383 | 0.328                  | 600    | 0.246  | 0.405 |
|            |     | 1.5 | 0.455                | 1355   | 0.407  | 0.501 | 0.582             | 57     | 0.352  | 0.746 | 0.421              | 480    | 0.335  | 0.500 | 0.400             | 615    | 0.323  | 0.471 | 0.421                  | 600    | 0.345  | 0.492 |
|            |     | 1.6 | 0.471                | 1355   | 0.423  | 0.516 | 0.582             | 57     | 0.352  | 0.746 | 0.432              | 480    | 0.347  | 0.510 | 0.416             | 615    | 0.340  | 0.486 | 0.446                  | 600    | 0.372  | 0.515 |
| 1.7        | 1.9 | 1.7 | 0.833                | 18986  | 0.828  | 0.838 | 0.878             | 4791   | 0.871  | 0.885 | 0.823              | 6952   | 0.814  | 0.831 | 0.814             | 8280   | 0.806  | 0.822 | 0.793                  | 8096   | 0.784  | 0.802 |
|            |     | 1.9 | 0.863                | 18986  | 0.859  | 0.867 | 0.897             | 4791   | 0.891  | 0.903 | 0.848              | 6952   | 0.840  | 0.855 | 0.842             | 8280   | 0.835  | 0.849 | 0.823                  | 8096   | 0.815  | 0.831 |
|            |     | 2   | 0.944                | 18986  | 0.942  | 0.946 | 0.942             | 4791   | 0.939  | 0.946 | 0.902              | 6952   | 0.897  | 0.907 | 0.906             | 8280   | 0.902  | 0.910 | 0.900                  | 8096   | 0.895  | 0.905 |



Table S9: Alternate minimum repeat lengths for protein LCRs containing periodic amino acid repeats. Correlation coefficients, number of LCR data points, and 95% confidence intervals are given for each parameter set.

| Repeat Lengths |    |     | <i>S. cerevisiae</i> |     |        | <i>H. sapiens</i> |       |        | <i>A. thaliana</i> |       |        | <i>C. elegans</i> |       |        | <i>D. melanogaster</i> |      |        |       |       |      |       |       |
|----------------|----|-----|----------------------|-----|--------|-------------------|-------|--------|--------------------|-------|--------|-------------------|-------|--------|------------------------|------|--------|-------|-------|------|-------|-------|
| mono           | di | tri | r                    | n   | 95% CI | r                 | n     | 95% CI | r                  | n     | 95% CI | r                 | n     | 95% CI | r                      | n    | 95% CI |       |       |      |       |       |
| 5              | 3  | 3   | 0.524                | 485 | 0.448  | 0.592             | 0.422 | 2396   | 0.385              | 0.458 | 0.566  | 2457              | 0.535 | 0.595  | 0.476                  | 1363 | 0.429  | 0.521 | 0.485 | 2171 | 0.448 | 0.520 |
|                |    | 4   | 0.534                | 470 | 0.458  | 0.602             | 0.421 | 2364   | 0.383              | 0.457 | 0.569  | 2436              | 0.538 | 0.598  | 0.480                  | 1283 | 0.432  | 0.526 | 0.486 | 2136 | 0.449 | 0.521 |
|                |    | 5   | 0.534                | 466 | 0.458  | 0.603             | 0.422 | 2349   | 0.384              | 0.458 | 0.569  | 2435              | 0.538 | 0.598  | 0.481                  | 1269 | 0.432  | 0.527 | 0.487 | 2116 | 0.450 | 0.522 |
|                | 4  | 3   | 0.539                | 437 | 0.460  | 0.609             | 0.425 | 2214   | 0.386              | 0.462 | 0.570  | 2302              | 0.538 | 0.600  | 0.494                  | 1267 | 0.446  | 0.539 | 0.492 | 2007 | 0.454 | 0.528 |
|                |    | 4   | 0.550                | 421 | 0.471  | 0.620             | 0.423 | 2180   | 0.384              | 0.461 | 0.573  | 2280              | 0.541 | 0.603  | 0.499                  | 1186 | 0.450  | 0.545 | 0.493 | 1970 | 0.455 | 0.529 |
|                |    | 5   | 0.551                | 417 | 0.472  | 0.621             | 0.424 | 2165   | 0.385              | 0.462 | 0.573  | 2279              | 0.541 | 0.603  | 0.501                  | 1171 | 0.452  | 0.547 | 0.494 | 1949 | 0.456 | 0.531 |
|                | 5  | 3   | 0.549                | 423 | 0.470  | 0.619             | 0.426 | 2140   | 0.387              | 0.464 | 0.570  | 2250              | 0.538 | 0.600  | 0.505                  | 1230 | 0.457  | 0.550 | 0.499 | 1945 | 0.461 | 0.535 |
|                |    | 4   | 0.561                | 407 | 0.482  | 0.631             | 0.424 | 2105   | 0.384              | 0.462 | 0.573  | 2228              | 0.541 | 0.603  | 0.511                  | 1148 | 0.462  | 0.557 | 0.499 | 1908 | 0.460 | 0.536 |
|                |    | 5   | 0.562                | 403 | 0.483  | 0.632             | 0.425 | 2090   | 0.385              | 0.463 | 0.573  | 2227              | 0.541 | 0.603  | 0.514                  | 1133 | 0.465  | 0.560 | 0.501 | 1887 | 0.462 | 0.538 |
| 6              | 3  | 3   | 0.532                | 379 | 0.446  | 0.608             | 0.445 | 1847   | 0.403              | 0.485 | 0.595  | 1842              | 0.561 | 0.627  | 0.520                  | 991  | 0.467  | 0.569 | 0.505 | 1715 | 0.465 | 0.543 |
|                |    | 4   | 0.545                | 364 | 0.459  | 0.621             | 0.443 | 1813   | 0.401              | 0.483 | 0.600  | 1817              | 0.566 | 0.632  | 0.530                  | 906  | 0.476  | 0.580 | 0.506 | 1678 | 0.465 | 0.545 |
|                |    | 5   | 0.546                | 360 | 0.460  | 0.622             | 0.444 | 1798   | 0.402              | 0.484 | 0.599  | 1815              | 0.565 | 0.631  | 0.531                  | 891  | 0.476  | 0.582 | 0.508 | 1658 | 0.467 | 0.547 |
|                | 4  | 3   | 0.544                | 327 | 0.453  | 0.624             | 0.451 | 1641   | 0.407              | 0.493 | 0.599  | 1659              | 0.563 | 0.632  | 0.547                  | 877  | 0.493  | 0.597 | 0.517 | 1526 | 0.475 | 0.557 |
|                |    | 4   | 0.560                | 311 | 0.469  | 0.639             | 0.448 | 1604   | 0.403              | 0.491 | 0.604  | 1633              | 0.569 | 0.637  | 0.559                  | 791  | 0.503  | 0.610 | 0.517 | 1487 | 0.474 | 0.557 |
|                |    | 5   | 0.561                | 307 | 0.469  | 0.641             | 0.449 | 1589   | 0.404              | 0.492 | 0.603  | 1631              | 0.567 | 0.636  | 0.562                  | 775  | 0.506  | 0.613 | 0.520 | 1466 | 0.477 | 0.560 |
|                | 5  | 3   | 0.556                | 313 | 0.464  | 0.636             | 0.451 | 1562   | 0.406              | 0.494 | 0.598  | 1600              | 0.562 | 0.632  | 0.566                  | 837  | 0.512  | 0.615 | 0.525 | 1453 | 0.482 | 0.565 |
|                |    | 4   | 0.573                | 297 | 0.481  | 0.652             | 0.448 | 1524   | 0.402              | 0.492 | 0.603  | 1574              | 0.567 | 0.637  | 0.579                  | 750  | 0.523  | 0.630 | 0.525 | 1413 | 0.482 | 0.566 |
|                |    | 5   | 0.574                | 293 | 0.482  | 0.654             | 0.449 | 1509   | 0.403              | 0.493 | 0.603  | 1572              | 0.567 | 0.637  | 0.584                  | 734  | 0.528  | 0.635 | 0.527 | 1392 | 0.483 | 0.568 |
| 7              | 3  | 3   | 0.532                | 379 | 0.446  | 0.608             | 0.445 | 1847   | 0.403              | 0.485 | 0.595  | 1842              | 0.561 | 0.627  | 0.520                  | 991  | 0.467  | 0.569 | 0.505 | 1715 | 0.465 | 0.543 |
|                |    | 4   | 0.545                | 364 | 0.459  | 0.621             | 0.443 | 1813   | 0.401              | 0.483 | 0.600  | 1817              | 0.566 | 0.632  | 0.530                  | 906  | 0.476  | 0.580 | 0.506 | 1678 | 0.465 | 0.545 |
|                |    | 5   | 0.546                | 360 | 0.460  | 0.622             | 0.444 | 1798   | 0.402              | 0.484 | 0.599  | 1815              | 0.565 | 0.631  | 0.531                  | 891  | 0.476  | 0.582 | 0.508 | 1658 | 0.467 | 0.547 |
|                | 4  | 3   | 0.539                | 265 | 0.436  | 0.628             | 0.468 | 1209   | 0.417              | 0.516 | 0.626  | 1129              | 0.585 | 0.664  | 0.566                  | 627  | 0.504  | 0.623 | 0.556 | 1186 | 0.511 | 0.598 |
|                |    | 4   | 0.557                | 248 | 0.453  | 0.646             | 0.464 | 1168   | 0.412              | 0.513 | 0.632  | 1100              | 0.591 | 0.670  | 0.584                  | 540  | 0.518  | 0.643 | 0.560 | 1139 | 0.514 | 0.603 |
|                |    | 5   | 0.558                | 244 | 0.454  | 0.647             | 0.465 | 1153   | 0.413              | 0.514 | 0.632  | 1098              | 0.591 | 0.670  | 0.588                  | 523  | 0.522  | 0.647 | 0.563 | 1118 | 0.517 | 0.606 |
|                | 5  | 3   | 0.550                | 250 | 0.446  | 0.640             | 0.467 | 1128   | 0.415              | 0.516 | 0.626  | 1068              | 0.584 | 0.665  | 0.592                  | 581  | 0.530  | 0.648 | 0.566 | 1105 | 0.520 | 0.609 |
|                |    | 4   | 0.568                | 233 | 0.463  | 0.658             | 0.463 | 1085   | 0.409              | 0.514 | 0.632  | 1039              | 0.589 | 0.671  | 0.612                  | 493  | 0.547  | 0.670 | 0.570 | 1057 | 0.523 | 0.614 |
|                |    | 5   | 0.570                | 229 | 0.464  | 0.660             | 0.464 | 1070   | 0.410              | 0.515 | 0.632  | 1037              | 0.589 | 0.671  | 0.618                  | 476  | 0.552  | 0.676 | 0.573 | 1036 | 0.526 | 0.617 |
| 10             | 3  | 3   | 0.532                | 379 | 0.446  | 0.608             | 0.445 | 1847   | 0.403              | 0.485 | 0.595  | 1842              | 0.561 | 0.627  | 0.520                  | 991  | 0.467  | 0.569 | 0.505 | 1715 | 0.465 | 0.543 |
|                |    | 4   | 0.545                | 364 | 0.459  | 0.621             | 0.443 | 1813   | 0.401              | 0.483 | 0.600  | 1817              | 0.566 | 0.632  | 0.530                  | 906  | 0.476  | 0.580 | 0.506 | 1678 | 0.465 | 0.545 |
|                |    | 5   | 0.546                | 360 | 0.460  | 0.622             | 0.444 | 1798   | 0.402              | 0.484 | 0.599  | 1815              | 0.565 | 0.631  | 0.531                  | 891  | 0.476  | 0.582 | 0.508 | 1658 | 0.467 | 0.547 |
|                | 4  | 3   | 0.519                | 214 | 0.401  | 0.620             | 0.452 | 884    | 0.392              | 0.509 | 0.646  | 771               | 0.598 | 0.690  | 0.566                  | 474  | 0.494  | 0.631 | 0.562 | 918  | 0.511 | 0.609 |
|                |    | 4   | 0.539                | 197 | 0.419  | 0.641             | 0.445 | 841    | 0.382              | 0.503 | 0.654  | 742               | 0.606 | 0.698  | 0.589                  | 385  | 0.511  | 0.657 | 0.568 | 868  | 0.516 | 0.616 |
|                |    | 5   | 0.541                | 193 | 0.419  | 0.643             | 0.447 | 826    | 0.384              | 0.506 | 0.653  | 740               | 0.604 | 0.697  | 0.593                  | 367  | 0.514  | 0.662 | 0.572 | 845  | 0.519 | 0.620 |
|                | 5  | 3   | 0.504                | 161 | 0.363  | 0.622             | 0.486 | 594    | 0.414              | 0.552 | 0.646  | 454               | 0.582 | 0.702  | 0.543                  | 315  | 0.450  | 0.624 | 0.549 | 637  | 0.486 | 0.607 |
|                |    | 4   | 0.518                | 120 | 0.355  | 0.650             | 0.463 | 420    | 0.375              | 0.543 | 0.678  | 298               | 0.603 | 0.741  | 0.580                  | 164  | 0.454  | 0.683 | 0.564 | 447  | 0.489 | 0.631 |
|                |    | 5   | 0.521                | 116 | 0.356  | 0.655             | 0.464 | 405    | 0.374              | 0.545 | 0.676  | 296               | 0.601 | 0.739  | 0.594                  | 146  | 0.463  | 0.700 | 0.572 | 423  | 0.496 | 0.639 |

Table S10: Alternate repeat lengths for cryptic repeat protein LCRs defined as LCRs which do not contain sequences with the minimal periodic amino acid repeat length. Correlation coefficients, number of LCR data points, and 95% confidence intervals are given for each parameter set.

| Repeat Lengths |    |     | <i>S. cerevisiae</i> |     |        |       | <i>H. sapiens</i> |      |        |       | <i>A. thaliana</i> |      |        |       | <i>C. elegans</i> |      |        |       | <i>D. melanogaster</i> |      |        |       |
|----------------|----|-----|----------------------|-----|--------|-------|-------------------|------|--------|-------|--------------------|------|--------|-------|-------------------|------|--------|-------|------------------------|------|--------|-------|
| mono           | di | tri | r                    | n   | 95% CI |       | r                 | n    | 95% CI |       | r                  | n    | 95% CI |       | r                 | n    | 95% CI |       | r                      | n    | 95% CI |       |
| 5              | 3  | 3   | 0.325                | 549 | 0.239  | 0.406 | 0.233             | 2609 | 0.192  | 0.273 | 0.272              | 2013 | 0.226  | 0.316 | 0.210             | 1711 | 0.159  | 0.260 | 0.224                  | 1688 | 0.173  | 0.274 |
|                |    | 4   | 0.328                | 564 | 0.243  | 0.408 | 0.235             | 2641 | 0.194  | 0.275 | 0.266              | 2034 | 0.220  | 0.310 | 0.212             | 1791 | 0.162  | 0.261 | 0.234                  | 1723 | 0.184  | 0.283 |
|                |    | 5   | 0.332                | 568 | 0.248  | 0.411 | 0.233             | 2656 | 0.193  | 0.273 | 0.266              | 2035 | 0.220  | 0.310 | 0.213             | 1805 | 0.163  | 0.262 | 0.231                  | 1743 | 0.181  | 0.280 |
|                | 4  | 3   | 0.314                | 597 | 0.231  | 0.392 | 0.239             | 2791 | 0.200  | 0.278 | 0.273              | 2168 | 0.229  | 0.316 | 0.205             | 1807 | 0.155  | 0.254 | 0.232                  | 1852 | 0.183  | 0.279 |
|                |    | 4   | 0.316                | 613 | 0.234  | 0.393 | 0.242             | 2825 | 0.203  | 0.280 | 0.267              | 2190 | 0.223  | 0.310 | 0.207             | 1888 | 0.158  | 0.255 | 0.241                  | 1889 | 0.193  | 0.288 |
|                |    | 5   | 0.320                | 617 | 0.239  | 0.397 | 0.240             | 2840 | 0.201  | 0.278 | 0.267              | 2191 | 0.223  | 0.310 | 0.207             | 1903 | 0.159  | 0.254 | 0.239                  | 1910 | 0.191  | 0.286 |
|                | 5  | 3   | 0.302                | 611 | 0.219  | 0.380 | 0.238             | 2865 | 0.199  | 0.276 | 0.285              | 2220 | 0.242  | 0.327 | 0.201             | 1844 | 0.152  | 0.249 | 0.224                  | 1914 | 0.176  | 0.271 |
|                |    | 4   | 0.304                | 627 | 0.223  | 0.381 | 0.241             | 2900 | 0.202  | 0.279 | 0.279              | 2242 | 0.236  | 0.321 | 0.203             | 1926 | 0.155  | 0.250 | 0.233                  | 1951 | 0.186  | 0.279 |
|                |    | 5   | 0.309                | 631 | 0.228  | 0.386 | 0.239             | 2915 | 0.200  | 0.277 | 0.279              | 2243 | 0.236  | 0.321 | 0.203             | 1941 | 0.155  | 0.250 | 0.231                  | 1972 | 0.184  | 0.277 |
| 6              | 3  | 3   | 0.339                | 655 | 0.261  | 0.412 | 0.233             | 3158 | 0.196  | 0.269 | 0.299              | 2628 | 0.260  | 0.337 | 0.219             | 2083 | 0.173  | 0.264 | 0.267                  | 2144 | 0.223  | 0.310 |
|                |    | 4   | 0.340                | 670 | 0.263  | 0.413 | 0.237             | 3192 | 0.200  | 0.273 | 0.294              | 2653 | 0.255  | 0.332 | 0.219             | 2168 | 0.174  | 0.263 | 0.274                  | 2181 | 0.230  | 0.317 |
|                |    | 5   | 0.344                | 674 | 0.268  | 0.416 | 0.235             | 3207 | 0.198  | 0.271 | 0.294              | 2655 | 0.255  | 0.332 | 0.221             | 2183 | 0.176  | 0.265 | 0.272                  | 2201 | 0.228  | 0.315 |
|                | 4  | 3   | 0.331                | 707 | 0.256  | 0.402 | 0.240             | 3364 | 0.204  | 0.275 | 0.298              | 2811 | 0.260  | 0.335 | 0.215             | 2197 | 0.170  | 0.259 | 0.270                  | 2333 | 0.228  | 0.311 |
|                |    | 4   | 0.332                | 723 | 0.258  | 0.402 | 0.243             | 3401 | 0.207  | 0.278 | 0.293              | 2837 | 0.255  | 0.330 | 0.215             | 2283 | 0.171  | 0.258 | 0.276                  | 2372 | 0.234  | 0.317 |
|                |    | 5   | 0.335                | 727 | 0.261  | 0.405 | 0.242             | 3416 | 0.206  | 0.277 | 0.294              | 2839 | 0.256  | 0.331 | 0.215             | 2299 | 0.171  | 0.258 | 0.275                  | 2393 | 0.233  | 0.316 |
|                | 5  | 3   | 0.321                | 721 | 0.246  | 0.392 | 0.239             | 3443 | 0.204  | 0.274 | 0.307              | 2870 | 0.270  | 0.343 | 0.211             | 2237 | 0.166  | 0.255 | 0.264                  | 2406 | 0.222  | 0.305 |
|                |    | 4   | 0.322                | 737 | 0.248  | 0.392 | 0.242             | 3481 | 0.207  | 0.277 | 0.302              | 2896 | 0.265  | 0.338 | 0.211             | 2324 | 0.167  | 0.254 | 0.271                  | 2446 | 0.230  | 0.311 |
|                |    | 5   | 0.325                | 741 | 0.251  | 0.395 | 0.241             | 3496 | 0.206  | 0.275 | 0.303              | 2898 | 0.266  | 0.339 | 0.211             | 2340 | 0.167  | 0.254 | 0.269                  | 2467 | 0.228  | 0.309 |
| 7              | 3  | 3   | 0.339                | 655 | 0.261  | 0.412 | 0.233             | 3158 | 0.196  | 0.269 | 0.299              | 2628 | 0.260  | 0.337 | 0.219             | 2083 | 0.173  | 0.264 | 0.267                  | 2144 | 0.223  | 0.310 |
|                |    | 4   | 0.340                | 670 | 0.263  | 0.413 | 0.237             | 3192 | 0.200  | 0.273 | 0.294              | 2653 | 0.255  | 0.332 | 0.219             | 2168 | 0.174  | 0.263 | 0.274                  | 2181 | 0.230  | 0.317 |
|                |    | 5   | 0.344                | 674 | 0.268  | 0.416 | 0.235             | 3207 | 0.198  | 0.271 | 0.294              | 2655 | 0.255  | 0.332 | 0.221             | 2183 | 0.176  | 0.265 | 0.272                  | 2201 | 0.228  | 0.315 |
|                | 4  | 3   | 0.347                | 769 | 0.276  | 0.414 | 0.260             | 3796 | 0.227  | 0.293 | 0.336              | 3341 | 0.302  | 0.369 | 0.258             | 2447 | 0.216  | 0.299 | 0.283                  | 2673 | 0.244  | 0.321 |
|                |    | 4   | 0.351                | 786 | 0.281  | 0.417 | 0.264             | 3837 | 0.231  | 0.297 | 0.332              | 3370 | 0.298  | 0.365 | 0.257             | 2534 | 0.216  | 0.297 | 0.287                  | 2720 | 0.248  | 0.325 |
|                |    | 5   | 0.353                | 790 | 0.283  | 0.419 | 0.262             | 3852 | 0.229  | 0.294 | 0.332              | 3372 | 0.298  | 0.365 | 0.257             | 2551 | 0.216  | 0.297 | 0.285                  | 2741 | 0.246  | 0.323 |
|                | 5  | 3   | 0.338                | 784 | 0.267  | 0.405 | 0.259             | 3877 | 0.226  | 0.291 | 0.342              | 3402 | 0.308  | 0.375 | 0.254             | 2493 | 0.213  | 0.294 | 0.279                  | 2754 | 0.240  | 0.317 |
|                |    | 4   | 0.342                | 801 | 0.272  | 0.408 | 0.262             | 3920 | 0.229  | 0.294 | 0.338              | 3431 | 0.305  | 0.371 | 0.253             | 2581 | 0.212  | 0.293 | 0.284                  | 2802 | 0.246  | 0.322 |
|                |    | 5   | 0.344                | 805 | 0.274  | 0.410 | 0.261             | 3935 | 0.228  | 0.293 | 0.339              | 3433 | 0.306  | 0.372 | 0.253             | 2598 | 0.212  | 0.293 | 0.282                  | 2823 | 0.244  | 0.319 |
| 10             | 3  | 3   | 0.339                | 655 | 0.261  | 0.412 | 0.233             | 3158 | 0.196  | 0.269 | 0.299              | 2628 | 0.260  | 0.337 | 0.219             | 2083 | 0.173  | 0.264 | 0.267                  | 2144 | 0.223  | 0.310 |
|                |    | 4   | 0.340                | 670 | 0.263  | 0.413 | 0.237             | 3192 | 0.200  | 0.273 | 0.294              | 2653 | 0.255  | 0.332 | 0.219             | 2168 | 0.174  | 0.263 | 0.274                  | 2181 | 0.230  | 0.317 |
|                |    | 5   | 0.344                | 674 | 0.268  | 0.416 | 0.235             | 3207 | 0.198  | 0.271 | 0.294              | 2655 | 0.255  | 0.332 | 0.221             | 2183 | 0.176  | 0.265 | 0.272                  | 2201 | 0.228  | 0.315 |
|                | 4  | 3   | 0.376                | 820 | 0.309  | 0.440 | 0.312             | 4121 | 0.281  | 0.342 | 0.368              | 3699 | 0.337  | 0.399 | 0.285             | 2600 | 0.245  | 0.324 | 0.328                  | 2941 | 0.292  | 0.363 |
|                |    | 4   | 0.377                | 837 | 0.310  | 0.440 | 0.314             | 4164 | 0.283  | 0.344 | 0.364              | 3728 | 0.333  | 0.395 | 0.283             | 2689 | 0.244  | 0.321 | 0.330                  | 2991 | 0.294  | 0.365 |
|                |    | 5   | 0.379                | 841 | 0.313  | 0.442 | 0.313             | 4179 | 0.282  | 0.343 | 0.364              | 3730 | 0.333  | 0.395 | 0.283             | 2707 | 0.244  | 0.321 | 0.329                  | 3014 | 0.293  | 0.364 |
|                | 5  | 3   | 0.399                | 873 | 0.335  | 0.459 | 0.321             | 4411 | 0.291  | 0.350 | 0.437              | 4016 | 0.409  | 0.464 | 0.322             | 2759 | 0.284  | 0.359 | 0.366                  | 3222 | 0.332  | 0.399 |
|                |    | 4   | 0.427                | 914 | 0.366  | 0.484 | 0.342             | 4585 | 0.313  | 0.370 | 0.455              | 4172 | 0.428  | 0.481 | 0.333             | 2910 | 0.297  | 0.369 | 0.377                  | 3412 | 0.344  | 0.409 |
|                |    | 5   | 0.428                | 918 | 0.367  | 0.485 | 0.341             | 4600 | 0.312  | 0.369 | 0.455              | 4174 | 0.428  | 0.481 | 0.333             | 2928 | 0.297  | 0.368 | 0.376                  | 3436 | 0.344  | 0.408 |

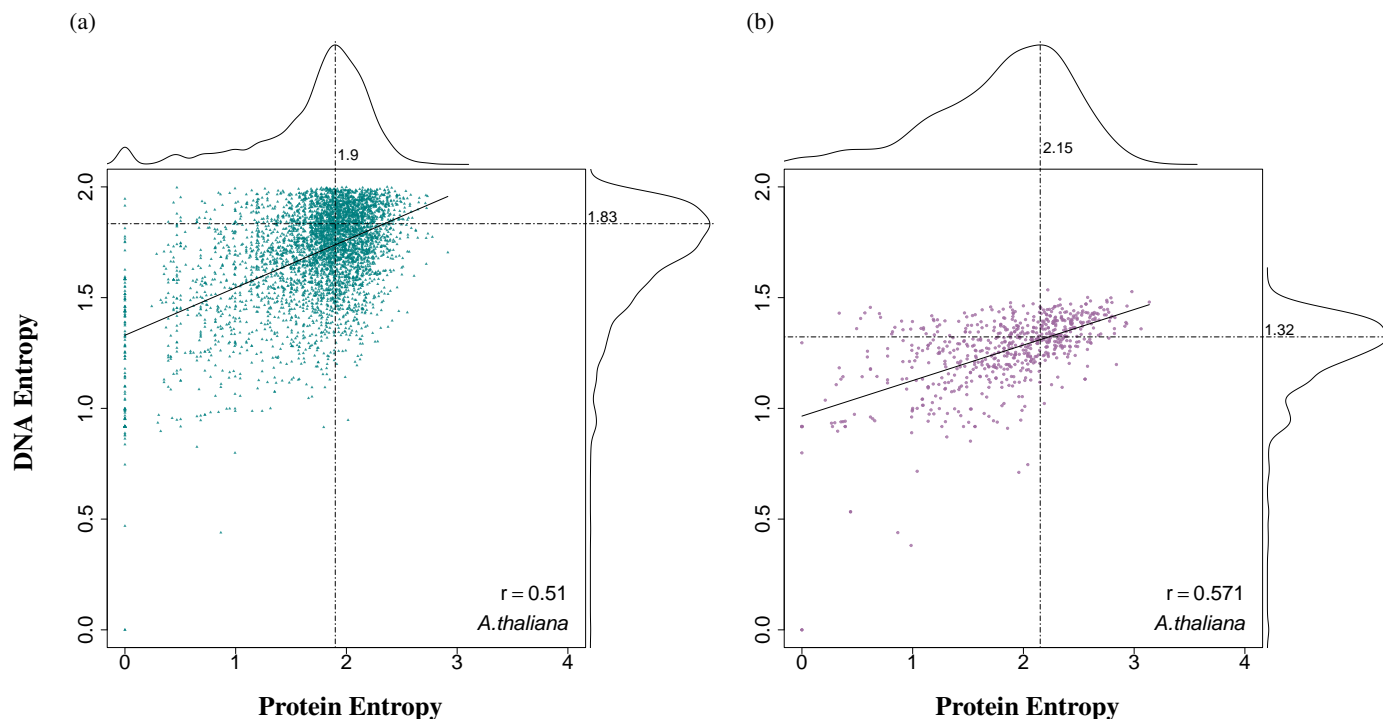

Figure S1: Entropy comparisons of LCRs and corresponding sequences in the *A. thaliana* genome. Distributions of sequence entropies can be found along the vertical and horizontal axes with values indicating the mode. (a) 4470 LCRs were identified from 48 265 protein sequences and their entropies were plotted against entropies of the corresponding DNA sequences ( $r = 0.510$ ). (b) 676 LCRs were identified from 48 265 coding sequences and their entropies were plotted against the entropies of the corresponding protein sequences ( $r = 0.571$ ).

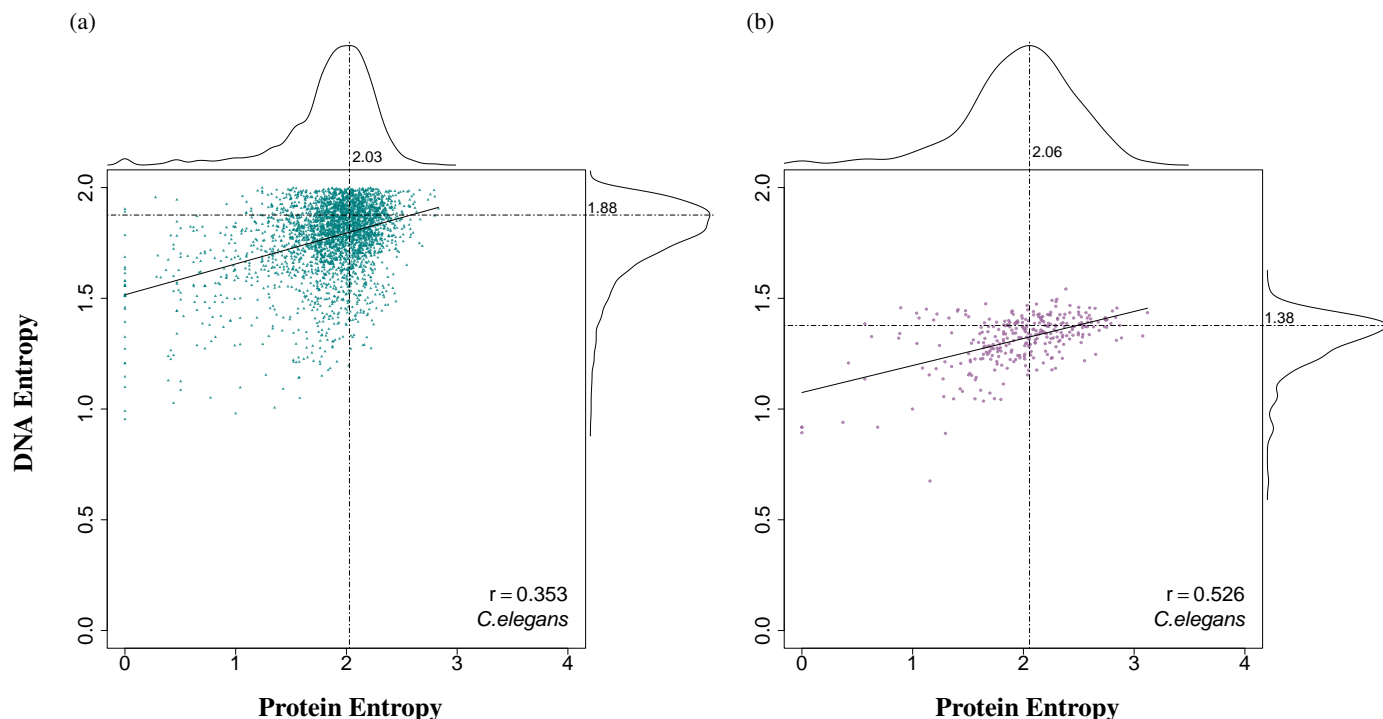

Figure S2: Entropy comparisons of LCRs and corresponding sequences in the *C. elegans* genome. Distributions of sequence entropies can be found along the vertical and horizontal axes with values indicating the mode. (a) 3074 LCRs were identified from 30 502 protein sequences and their entropies were plotted against the entropies of the corresponding DNA sequences ( $r = 0.353$ ). (b) 314 LCRs were identified from 30 502 coding sequences and their entropies were plotted against the entropies of the corresponding protein sequences ( $r = 0.526$ ).

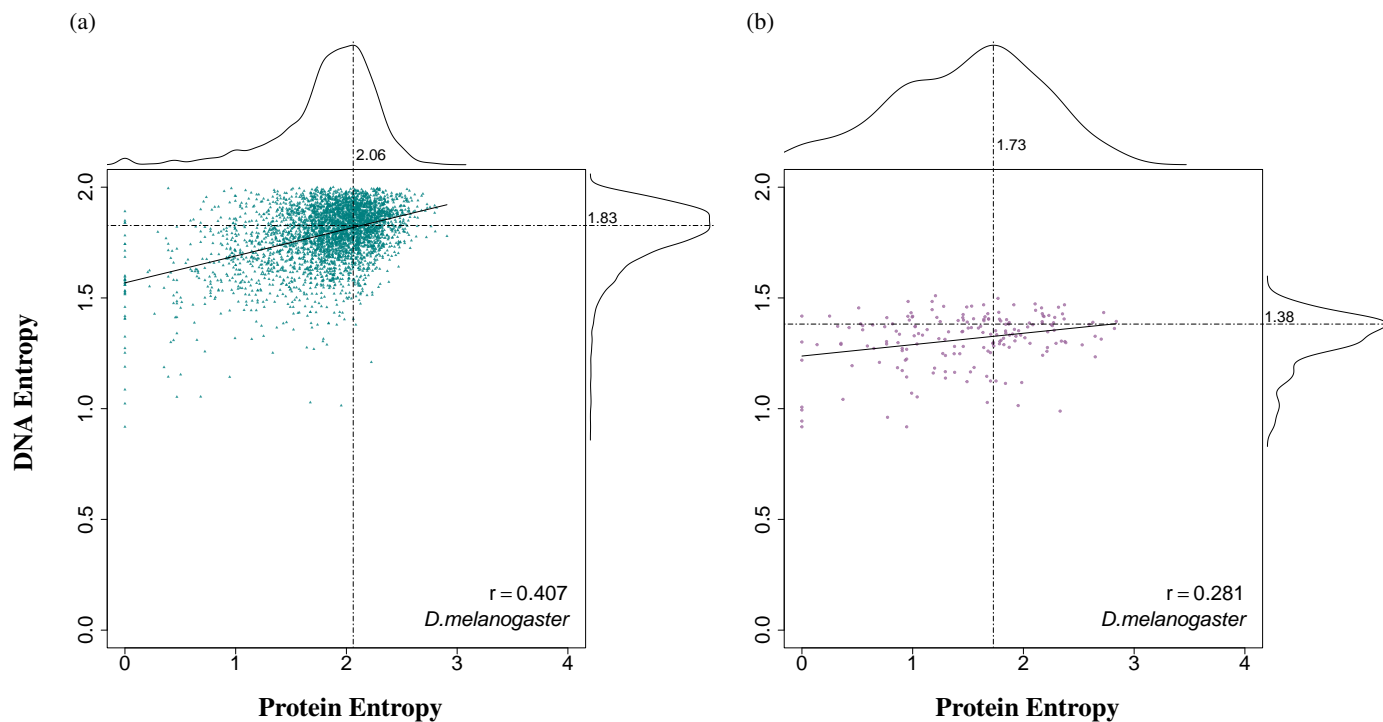

Figure S3: Entropy comparisons of LCRs and corresponding sequences in the *D. melanogaster* genome. Distributions of sequence entropies can be found along the vertical and horizontal axes with values indicating the mode. (a) 3859 LCRs were identified from 30 726 protein sequences and their entropies were plotted against the entropies of the corresponding DNA sequences ( $r = 0.407$ ). (b) 182 LCRs were identified from 30 726 coding sequences and their entropies were plotted against the entropies of the corresponding protein sequences ( $r = 0.281$ ).

Table S11: Summary of correlation coefficients and 95% confidence intervals for the main parameters:  $W = 15$ ,  $K1 = 1.9$ ,  $K2 = 2.2$  (protein LCRs),  $W = 45$ ,  $K1 = 1.3$ ,  $K2 = 1.5$  (DNA LCRs), LCRs with amino acid repeats of minimal length 6, 5, and 4 for mono-, di- and tri- repeats, respectively (periodic LCRs). LCRs without repeats of minimal length 6, 5, and 4 for mono-, di-, and tri- repeats, respectively (cryptic LCRs). Results for the main parameters are given for the five model organisms (bio), the periodic repeat and cryptic LCRs, as well as the four species specific slippage and substitution models. Information for the Null simulation which is not species specific is given at the bottom.

|                     |                     | <i>S. cerevisiae</i> |                | <i>H. sapiens</i> |               | <i>A. thaliana</i> |               | <i>C. elegans</i> |               | <i>D. melanogaster</i> |               |
|---------------------|---------------------|----------------------|----------------|-------------------|---------------|--------------------|---------------|-------------------|---------------|------------------------|---------------|
| <b>Bio</b>          | <b>Protein LCRs</b> | 0.488                | (0.435-0.538)  | 0.374             | (0.347-0.400) | 0.510              | (0.485-0.534) | 0.353             | (0.318-0.387) | 0.407                  | (0.377-0.436) |
|                     | <b>DNA LCRs</b>     | 0.428                | (0.281-0.555)  | 0.579             | (0.541-0.614) | 0.571              | (0.512-0.625) | 0.526             | (0.431-0.610) | 0.281                  | (0.125-0.424) |
| <b>Slip</b>         | <b>Protein LCRs</b> | 0.566                | (0.555-0.577)  | 0.658             | (0.637-0.678) | 0.594              | (0.579-0.608) | 0.547             | (0.532-0.562) | 0.596                  | (0.583-0.608) |
|                     | <b>DNA LCRs</b>     | 0.591                | (0.573-0.608)  | 0.573             | (0.503-0.636) | 0.492              | (0.457-0.526) | 0.514             | (0.484-0.543) | 0.427                  | (0.392-0.461) |
| <b>Slip+Syn</b>     | <b>Protein LCRs</b> | 0.459                | (0.446-0.472)  | 0.585             | (0.561-0.608) | 0.475              | (0.457-0.492) | 0.457             | (0.440-0.474) | 0.480                  | (0.465-0.495) |
|                     | <b>DNA LCRs</b>     | 0.517                | (0.489-0.544)  | 0.588             | (0.492-0.670) | 0.513              | (0.466-0.557) | 0.445             | (0.400-0.488) | 0.475                  | (0.431-0.517) |
| <b>Slip+CC</b>      | <b>Protein LCRs</b> | 0.699                | (0.690-0.707)  | 0.808             | (0.795-0.820) | 0.757              | (0.747-0.767) | 0.718             | (0.707-0.728) | 0.671                  | (0.660-0.682) |
|                     | <b>DNA LCRs</b>     | 0.553                | (0.534-0.572)  | 0.546             | (0.479-0.607) | 0.535              | (0.503-0.565) | 0.497             | (0.467-0.526) | 0.582                  | (0.554-0.608) |
| <b>Slip+CC+Syn</b>  | <b>Protein LCRs</b> | 0.490                | (0.477-0.503)  | 0.620             | (0.598-0.641) | 0.518              | (0.501-0.534) | 0.504             | (0.488-0.520) | 0.486                  | (0.471-0.501) |
|                     | <b>DNA LCRs</b>     | 0.430                | (0.397-0.462)  | 0.536             | (0.446-0.615) | 0.452              | (0.403-0.498) | 0.396             | (0.348-0.442) | 0.458                  | (0.415-0.499) |
| <b>Protein LCRs</b> | <b>Periodic</b>     | 0.573                | (0.481-0.652)  | 0.448             | (0.402-0.492) | 0.603              | (0.567-0.637) | 0.579             | (0.523-0.630) | 0.525                  | (0.482-0.566) |
|                     | <b>Cryptic</b>      | 0.322                | (0.248-0.392)  | 0.242             | (0.207-0.277) | 0.302              | (0.265-0.338) | 0.211             | (0.167-0.254) | 0.271                  | (0.230-0.311) |
| <b>Null</b>         | <b>Protein LCRs</b> | 0.126                | (-0.139-0.374) |                   |               |                    |               |                   |               |                        |               |
|                     | <b>DNA LCRs</b>     | NA                   | NA             |                   |               |                    |               |                   |               |                        |               |

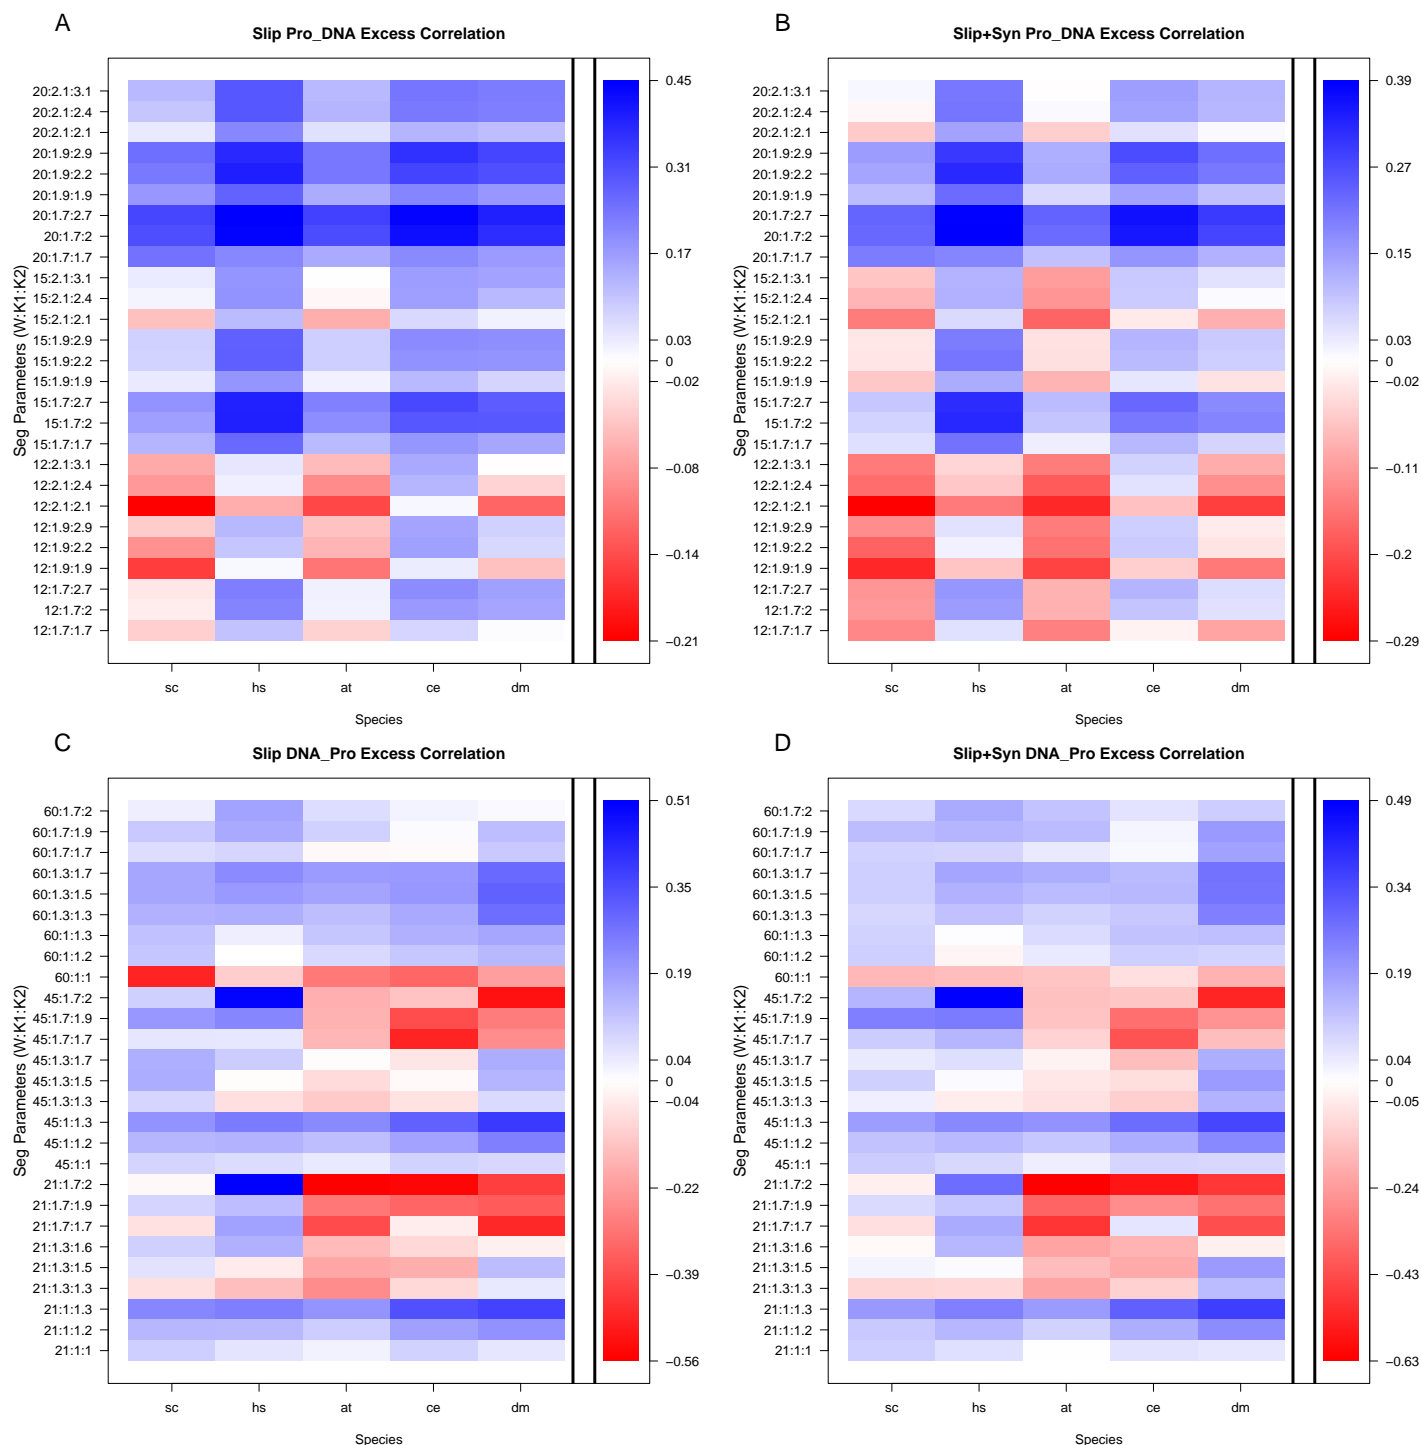

Figure S4: Heat maps showing the excess correlation of the slippage and substitution models compared to the biological correlations in *S. cerevisiae* (sc), *H. sapiens* (hs), *A. thaliana* (at), *C. elegans* (ce), and *D. melanogaster* (dm). Blue indicates a higher correlation in the simulated sequences relative to the biological sequences while red indicates a lower correlation in the simulated sequences relative to the biological sequences. **A)** Excess correlation in protein LCRs and corresponding coding sequences in the Slipp simulated sequences. **B)** Excess correlation in DNA LCRs and corresponding protein sequences in the Slipp simulated sequences. **C)** Excess correlation in protein LCRs and corresponding coding sequences in the Slipp+Syn simulated sequences. **D)** Excess correlation in DNA LCRs and corresponding protein sequences in the Slipp+Syn simulated sequences.

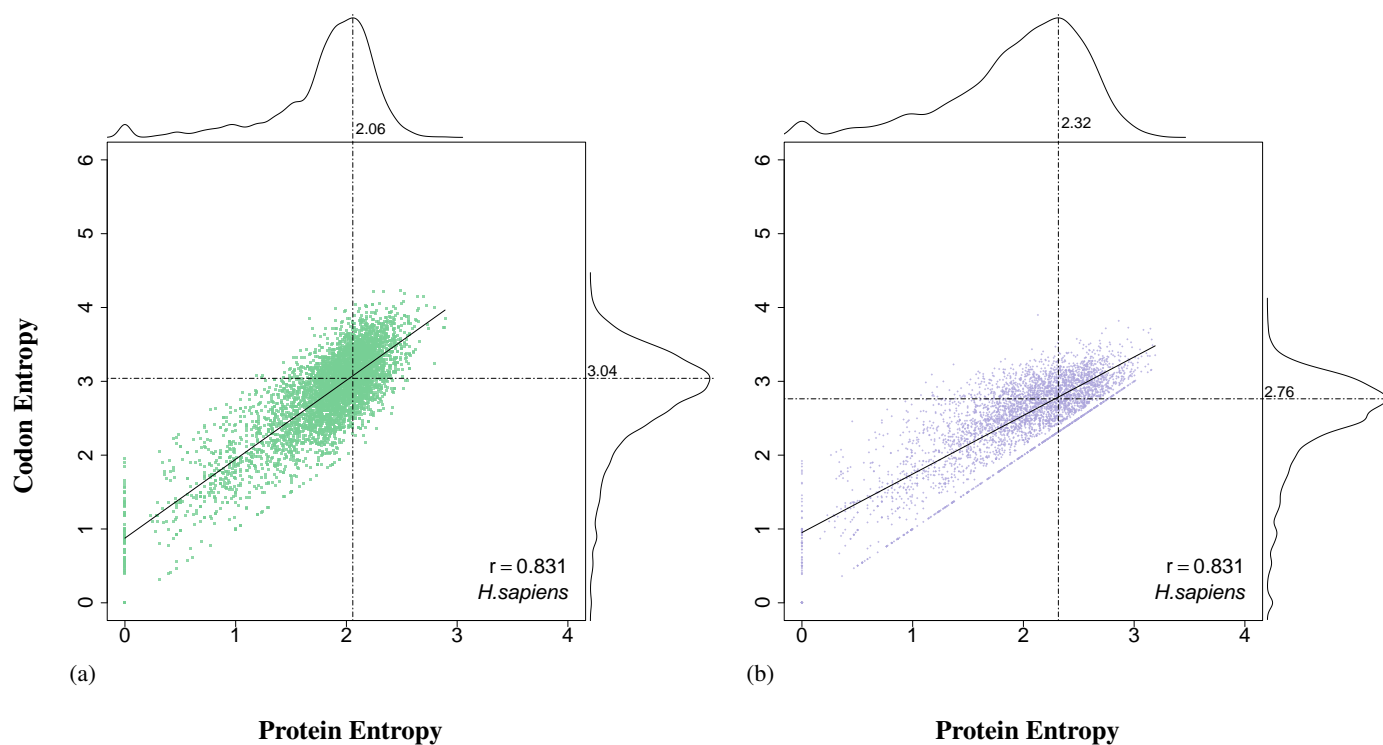

Figure S5: Entropy comparisons of LCRs and corresponding sequences in the *H. sapiens* genome. Distributions of sequence entropies can be found along the vertical and horizontal axes with values indicating the mode. (a) 5005 LCRs were identified from 133 689 protein sequences and their entropies were plotted against the codon entropies from the corresponding DNA sequences ( $r = 0.831$ ). (b) 4493 LCRs were identified from the codons in 133 689 coding sequences and their entropies were plotted against the entropies of the corresponding protein sequences ( $r = 0.831$ ).
